# Supplementary material for: Landscape of Métis health and wellness: protocol for a scoping review
Source: PubMed Central journal article supplement — BMJ Open. 2024 Mar 8;14(3):e077868. doi: 10.1136/bmjopen-2023-077868 (PMC10928757; doi:10.1136/bmjopen-2023-077868), 2024-03-08
Supplement: bmjopen-2023-077868.draft_revisions.pdf [file bmjopen-2023-077868.draft_revisions.pdf]

# BMJ Open

BMJ Open is committed to open peer review. As part of this commitment we make the peer review history of every article we publish publicly available.

When an article is published we post the peer reviewers' comments and the authors' responses online. We also post the versions of the paper that were used during peer review. These are the versions that the peer review comments apply to.

The versions of the paper that follow are the versions that were submitted during the peer review process. They are not the versions of record or the final published versions. They should not be cited or distributed as the published version of this manuscript.

BMJ Open is an open access journal and the full, final, typeset and author-corrected version of record of the manuscript is available on our site with no access controls, subscription charges or pay-per-view fees (<http://bmjopen.bmj.com>).

If you have any questions on BMJ Open's open peer review process please email [info.bmjopen@bmj.com](mailto:info.bmjopen@bmj.com)

# BMJ Open

## Protocol for A Scoping Review of the Landscape of Métis Health and Wellness

|                               |                                                                                                                                                                                                                                                                                                                                                                                                                                                                                                                                                                                                                                                                                                                                                                                                                                              |
|-------------------------------|----------------------------------------------------------------------------------------------------------------------------------------------------------------------------------------------------------------------------------------------------------------------------------------------------------------------------------------------------------------------------------------------------------------------------------------------------------------------------------------------------------------------------------------------------------------------------------------------------------------------------------------------------------------------------------------------------------------------------------------------------------------------------------------------------------------------------------------------|
| Journal:                      | <i>BMJ Open</i>                                                                                                                                                                                                                                                                                                                                                                                                                                                                                                                                                                                                                                                                                                                                                                                                                              |
| Manuscript ID                 | bmjopen-2023-077868                                                                                                                                                                                                                                                                                                                                                                                                                                                                                                                                                                                                                                                                                                                                                                                                                          |
| Article Type:                 | Protocol                                                                                                                                                                                                                                                                                                                                                                                                                                                                                                                                                                                                                                                                                                                                                                                                                                     |
| Date Submitted by the Author: | 17-Jul-2023                                                                                                                                                                                                                                                                                                                                                                                                                                                                                                                                                                                                                                                                                                                                                                                                                                  |
| Complete List of Authors:     | Boutros, Helana Marie; University of Toronto - St George Campus, Public Health; McMaster University, Health, Society and Aging<br>Koprach, Sabastian; University of Toronto - St George Campus, Public Health<br>Simms, Abigail; University of Toronto - St George Campus, Public Health<br>Tsui, Noel; University of Toronto - St George Campus, Public Health<br>Boyle, Rose-Anne; University of Toronto - St George Campus, Public Health<br>Maglietta, Jen; University of Toronto - St George Campus, Public Health<br>Riddell, Melissa; University of Toronto - St George Campus, Public Health<br>Sanftenberg, Santana; University of Toronto - St George Campus, Public Health<br>Cripps, Shelley; University of Toronto - St George Campus, Public Health<br>Edwards, Sarah; University of Toronto - St George Campus, Public Health |
| Keywords:                     | PUBLIC HEALTH, Health Literacy, EPIDEMIOLOGY, Health Services Accessibility, Primary Health Care, Health Education                                                                                                                                                                                                                                                                                                                                                                                                                                                                                                                                                                                                                                                                                                                           |
|                               |                                                                                                                                                                                                                                                                                                                                                                                                                                                                                                                                                                                                                                                                                                                                                                                                                                              |

SCHOLARONE™  
Manuscripts

1  
2  
3 Protocol for A Scoping Review of the Landscape of Métis Health and Wellness  
4

5 **Abbreviated Title:** Scoping Review Protocol on Métis Health  
6  
7  
8

9 Helana Marie Boutros (MPH)<sup>1,2,3\*</sup>, Sabastian Koprach (B.Sc.)<sup>1,3,4</sup> Abigail J. Simms (MPH)<sup>1,3</sup>, Noel Tsui  
10 (MPH)<sup>1,3</sup>, Rose-Anne Boyle<sup>1</sup>, Jen Maglietta<sup>1</sup>, Melissa Riddell<sup>1</sup>, Santana Sanftenberg<sup>1,5</sup>, Shelley Cripps<sup>1</sup>,  
11 Sarah A. Edwards (PhD)<sup>1,2,3</sup> and the Métis Nation of Ontario  
12

13  
14 1 Métis Nation of Ontario, Ottawa, Ontario, Canada

15 2 Dalla Lana School of Public Health, University of Toronto, Ontario, Canada

16 3 ICES, Ontario, Canada

17 4 Trent University, Peterborough, Ontario, Canada

18 5 Lakehead University, Thunder Bay, Ontario, Canada  
19  
20

21 Emails : [h.boutros@mail.utoronto.ca](mailto:h.boutros@mail.utoronto.ca) (HMB), [skoprach@mail.utoronto.ca](mailto:skoprach@mail.utoronto.ca) (SK), [abigail.simms@ices.on.ca](mailto:abigail.simms@ices.on.ca)  
22 (AJS), [noel.tsui@ices.on.ca](mailto:noel.tsui@ices.on.ca) (NT), [rose-anne@metisnation.org](mailto:rose-anne@metisnation.org) (RB), [jenm@metisnation.org](mailto:jenm@metisnation.org) (JM),  
23 [melissar@metisnation.org](mailto:melissar@metisnation.org) (MR), [srsanf@lakeheadu.ca](mailto:srsanf@lakeheadu.ca) (SS), [shelleycr@metisnation.org](mailto:shelleycr@metisnation.org) (SC);  
24 [sarah.edwards@ices.on.ca](mailto:sarah.edwards@ices.on.ca) (SAE)  
25  
26

27 \*Corresponding Author  
28  
29

30 **ORCID identifiers:**

31 Helana Marie Boutros: 0009-0007-4185-5063

32 Sabastian Koprach: 0009-0009-9243-0393

33 Noel Tsui: 0000-0002-5202-6873

34 Abigail J Simms: 0003-2779-5037  
35  
36  
37  
38  
39  
40  
41  
42  
43  
44  
45  
46  
47  
48  
49  
50  
51  
52  
53  
54  
55  
56  
57  
58  
59  
60

## Protocol for a Scoping Review of the Landscape of Métis Health

### Abstract

**Introduction:** In Canada, Métis people are one of three distinct Indigenous peoples whose rights are recognized and affirmed in Section 35 of the federal *Constitution Act, 1982*. In line with Métis people having a unique culture, history, language and way of life, a distinctions-based approach is critical to understand the current landscape of Métis-specific health. In this paper, we present a scoping review protocol to describe this research landscape in Canada led by the Métis Nation of Ontario (MNO).

**Methods and analysis:** This scoping review protocol is reported in line with the PRISMA-ScR reporting guidelines and follows Arksey and O'Malley's scoping review methodology. We will search electronic databases (Scopus, MEDLINE, Embase, Web of Science, CINAHL, APA PsycINFO, Anthropology Plus, Bibliography of Indigenous Peoples of North America, Canadian Business and Current Affairs, Indigenous Studies Portal, Informit Indigenous Collection, Collaborative Indigenous Garden, PubMed, ProQuest), grey literature sources and reference lists from selected papers. Two reviewers (HMB and SK) will double-blind screen all titles/ abstracts and full-text studies for inclusion. Any health-related study or health report that includes a Métis-specific health, well-being, or Métis social determinant of health outcome will be included. Relevant variables will be extracted following an iterative process whereby the data charting will be reviewed and updated.

**Ethics and dissemination:** Findings from this scoping review will be shared back through the MNO's existing community-based communication channels. Traditional academic dissemination will also be pursued.

**Key words:** Métis, health, Indigenous health, FNIM, public health, health outcomes, social determinants of health

### Article Summary Section

#### Strengths and Limitations of This Study

- This will be the first scoping review to describe the current landscape of Métis health.
- The search strategy includes fourteen electronic databases, as well as a broad range of grey literature sources, including Métis Nation-related websites to identify health reports and health deliverables of relevance to this review.
- Results will be shared across governing members of the Métis Nation and the Métis National Council as well through existing collaborative health tables who may choose to share it with their citizens and communities.
- Findings from this scoping review will support strategic planning on health research across the Métis Nation.

## Background

The Métis are a distinct Indigenous people with a unique history, culture, language, and way of life (*Métis Nation of Ontario | About the Métis of Ontario*, 2023). The Métis are one of three constitutionally recognized and distinct Aboriginal Peoples in Canada, and account for one third of the Indigenous population with a self-identifying population of 624,220 (*Membership in a Métis Organization or Settlement: Findings from the 2021 Census of Population*, 2021). Of the 624,220 who identify as Métis, 179,345 are Métis citizens represented by one of the five governments of the Canada-Métis Nation Accord across the homeland (*Membership in a Métis Organization or Settlement: Findings from the 2021 Census of Population*, 2021). The Métis Nation is comprised of descendants of people born of relations between First Nation women and European men who formed distinct communities spanning from Ontario to British Columbia (*Métis Nation of Ontario | Registry | Métis of Ontario*, 2023). Specifically, the Métis Nation of Ontario is the provincial governing body representing over 30,000 registered Métis citizens (*Métis Nation of Ontario | About the Métis of Ontario*, 2023). Currently, the Métis Nation of Ontario offers a number of programs and services to its citizens through its various branches (*Métis Nation of Ontario | About the Métis of Ontario*, 2023). In particular, the Healing and Wellness branch aims to support and advocate for the health needs of the Métis community in Ontario (*Métis Nation of Ontario | About the Métis of Ontario*, 2023).

Although Métis people are recognized as Indigenous people in the Canadian constitution, they are excluded from existing federal Indigenous-specific health policies and programs (Desmarais, 2017; *Métis Nation: A Vision for Health*, 2023). Meanwhile, historical policies such as residential schools and child welfare, notably the Sixties Scoop, attempted to assimilate Métis people in Canada (Allan and Smylie, 2015). Frequent disputes over jurisdiction eliminate Métis people from both mainstream and Indigenous-specific healthcare systems (*Métis Nation: A Vision for Health*, 2023). These discriminatory colonial practices have had a negative impact on health, identity, and way of life for Métis, including their ties to the land, governance and kinship systems (Fiona, 2012; Iseke, 2010). These political actions have contributed to a lack of Métis-specific research and accessible and accurate data, resulting in health disparities compared to the non-Indigenous population in Canada (Evans et al., 2012; *Métis Nation: A Vision for Health*, 2023; Smylie, 2009). Due to issues in data collection, pan-Indigenous approaches, which lump First Nations, Inuit, and Métis data together, the Métis story of health is often indistinguishable in these data sets.

Métis-specific health data is limited. The most recent literature review on Métis health only included publications up to 2009 and identified several gaps in Métis-specific health research (Kumar et al., 2012). As such, an updated review of the landscape of Métis health is necessary to support research, program and policy development, and to support the overall health and wellness of Métis people. Our work will expand on the only previously completed review of Métis health, by conducting a scoping review to capture Métis-specific health in what is now known as Canada (Kumar et al., 2012).

## Scoping Review Objectives

The primary objective of this scoping review is to describe the current landscape of Métis-specific health research in what is now known as Canada. Secondary objectives include identifying the proportion of studies that (a) were Métis-led or incorporated principles of ethical Métis research and (b) incorporated Métis determinants of health (*Principles of Ethical Métis Research*, 2018). For the purpose of this scoping review, these objectives will be exploratory in nature.

## Methods and Analysis

A scoping review will be used to explore the current landscape of Métis health and wellness research (Arksey and O'Malley, 2005). This approach was chosen as it allowed us to take a broader look

1  
2  
3 at Métis health and wellness as opposed to focusing on select outcomes (Peters et al., 2015). Conducting a  
4 scoping review, since it is a form of knowledge synthesis, will capture developments in Métis health  
5 research across disciplines (Peters et al., 2015). This scoping review will be fundamentally informed and  
6 supported by the Métis Nation of Ontario (MNO). The research relationship with the MNO is prioritized  
7 throughout this work to ensure the scoping review is relevant to the interests of the MNO (Bassett and  
8 McGibbon, 2013; Kirkness et al., 2001; *Principles of Ethical Métis Research*, 2018). Ultimately, our goal  
9 is to capture more recently published Métis health and wellness research which can be used to inform  
10 future MNO-led research projects (Munn et al., 2018).  
11

## 12 13 **Protocol Design** 14 15

16 This scoping review followed Arksey and O'Malley's scoping review methodology (Arksey and  
17 O'Malley, 2005). According to this methodology, there are six different stages in developing a scoping  
18 review: (1) identifying the research question; (2) identifying relevant studies; (3) selecting studies; (4)  
19 charting the data; (5) collating, summarizing, and reporting the results and (6) consulting with relevant  
20 stakeholders. In our case, we will be consulting with our relevant stakeholder, the MNO, throughout the  
21 scoping review process. The Preferred Reporting Items for Systematic Reviews and Meta-Analysis will  
22 be used to report the search results (Page and Moher, 2017).  
23  
24  
25

### 26 **Stage 1: Identifying the Research Question** 27

28 Through consultation with the MNO and the research team, the primary research question was  
29 co-conceived as: "What is the current landscape of Métis-specific health research in Canada?"  
30

### 31 **Stage 2: Identifying Relevant Studies - *Search Strategy and Information Sources*** 32

33 This stage will be iterative and will include reviewing the literature, refining the search strategy,  
34 and including further sources of evidence identified in reference lists from selected papers. Title and  
35 abstract review will precede the full-text review of the selected studies. The search strategy and inclusion  
36 and exclusion criteria have been co-developed and agreed on by the MNO and the research team. This  
37 study will be conducted between April 2023 and December 2023.  
38  
39

40 Identification of studies relevant to this review will be achieved by a structured search in the  
41 following electronic databases: Scopus, MEDLINE, Embase, Web of Science, CINAHL, APA  
42 PsycINFO, Anthropology Plus, Bibliography of Indigenous Peoples of North America, Canadian  
43 Business and Current Affairs, Indigenous Studies Portal, Informit Indigenous Collection, Collaborative  
44 Indigenous Garden, PubMed, ProQuest. The search strategy will be based on a systemic combination of  
45 keywords and Boolean operators AND/OR applied to each database. The search will be limited to articles  
46 published in the English language studies from 1980 to present date. Search results will be downloaded as  
47 ris files and imported into Covidence (Covidence systematic review software, Veritas Health Innovation,  
48 Melbourne, Australia. [www.covidence.org](http://www.covidence.org).) to store and manage papers.  
49  
50

51 To ensure that relevant information is captured for the landscape of Métis health, a variety of  
52 literature sources (e.g., Indigenous Studies Portal and Collaborative Indigenous Garden), as well as  
53 Google (first 100 hits), will be searched to identify published articles and reports that are relevant to this  
54 scoping review. Furthermore, a hand search will be conducted on all Métis Nation-related websites to  
55 identify health reports and health deliverables of relevance to this review. Forward and backward citation  
56  
57  
58  
59  
60

1  
2  
3 searches of all included documents will be conducted to identify additional studies that also meet the  
4 scoping review's inclusion criteria.  
5  
6

7  
8 Similar to the academic literature search, the grey literature search terms will be determined by  
9 the MNO and the research team. The search strategy for databases and grey literature will also be  
10 developed by the research team with iterative input from the MNO collaborators.

### 11 **Stage 3: Study Selection**

12  
13 The review process will consist of two levels of screening: (1) a title and abstract review and (2)  
14 full-text review. Two researchers (HMB and SK) will double blind screen the title and abstract of all  
15 imported citations and assess whether to include them, based on the set inclusion and exclusion criteria.  
16 Duplicates will be removed by Covidence prior to starting title/abstract screening and screeners will  
17 manually remove duplicates if appropriate. All studies that were included by both reviewers will undergo  
18 full-text review. In the second step, the two reviewers will independently review the full-texts against the  
19 inclusion and exclusion criteria. At this point, any discordant full-text studies will be reviewed again, in  
20 which both researchers will verbally be discussing their rationale for including or excluding these studies  
21 and resolving discordant votes on Covidence. If full consensus is not obtained regarding study inclusion  
22 and exclusion, a third reviewer will resolve any disagreement.  
23  
24

#### 25 *Inclusion criteria:*

- 26 • Published in the English language between 1980 and to present date.
- 27 • Include an identified Métis population (i.e., Can include self-identified, registered Métis etc.) that  
28 includes all age groups (disaggregated reporting if pan-Indigenous and absence of Métis-specific  
29 health outcomes).
- 30 • Examine a health, wellbeing, or Métis social determinant of health outcome.  
31

#### 32 *Exclusion criteria:*

- 33 • Pan-Indigenous (i.e., data is not disaggregated) or non-Métis population
- 34 • Not a health-related study (e.g., language or legal paper)
- 35 • Published in languages other than English due to the limited resources for translation.
- 36 • Published earlier than 1980.  
37  
38

### 39 **Stage 4: Data Collection**

40  
41 Study characteristics, as determined by the MNO and research team, will be extracted and  
42 summarized in a charting table for full-text studies, relevant forward and backward citations of full-text  
43 studies (snowballed studies), as well as hand searched Métis Nation-related health reports and other  
44 deliverables. The team will follow an iterative process (through monthly meetings and email  
45 correspondence) whereby the data charting will be reviewed, refined, and continually updated on an Excel  
46 spreadsheet document. Relevant variables will be extracted, including, but not limited to: author(s), year  
47 of publication, year of data collected, aims/ purpose, study population and size, methodology (e.g.,  
48 quantitative, qualitative, Métis methodologies), health context (e.g., primary healthcare setting,  
49 community setting, etc.), health outcome(s) studies, Métis-led/collaborative partnership/use of ethical  
50 principles of Métis research (e.g., the extent that research is Métis-led as opposed to led by government,  
51 for instance), Métis-involvement (e.g., the observance of one or more Métis authors in the literature) the  
52 presence of strength-based versus deficit-based approaches, incorporation of Métis social determinants of  
53 health and Métis vision of health (e.g., how literature is defining health, how these determinants are  
54  
55  
56  
57  
58  
59  
60

described in the literature and how they resonate across nations, irrespective of the formal document), and gaps and trajectories in the research.

With respect to grey literature, study characteristics extracted will include, but may not be limited to, hit result number, title, and health outcome. Data extraction will be conducted by one researcher and data will be compiled in Microsoft Excel spreadsheet for coding.

### **Stage 5: Data Summary and Synthesis of Results**

Since a scoping review aims to map key concepts and clarify conceptual boundaries of a topic or field, this scoping review will not be critically appraising the studies included (Arksey and O'Malley, 2005; Peter et al., 2015). Rather, this scoping review will provide an overview of all included studies (Arksey and O'Malley, 2005; Peter et al., 2015). Data will be conceptualized and condensed from data extraction tables for a narrative report of available data (Arksey and O'Malley, 2005) on the following themes: Métis populations studied, if the eligibility criteria was based on self-identification or Métis citizenship, if studies are Métis-specific or pan-Indigenous, health outcomes studied, region of study, study design, the extent to which studies were Métis-led or incorporated principles of ethical Métis research and incorporated Métis determinants of health. Results of full-text, snowballed results, hand-searched health reports and grey literature will be aggregated together and reported.

### **Stage 6: Consultation**

The MNO has a data-sharing agreement with ICES wherein ICES staff are seconded to the MNO and work exclusively on MNO health and wellness research at the direction of the MNO. This scoping review was co-conceived within this partnership. The research team includes MNO staff members, MNO citizens and non-Métis ICES researchers seconded to support Métis-driven research. To address the landscape of Métis health, the research team iteratively developed the research question, objectives, and search strategy, and will co-interpret the results throughout the entire research process; this will ensure that the research is strengths-based and for the collective benefit of Métis people and communities.

### **Dissemination and Ethics**

The MNO secretariat approved the study prior to commencement. Research ethics board approval is not required since data are from peer-reviewed publications or publicly shared reports and health deliverables. Findings from this scoping review will be shared back through the MNO's existing communication channels including their website, social media accounts, MNO Voyageur newspaper, and community gatherings. The research team will work closely with the MNO's communications team to develop knowledge products targeted to MNO citizens. Results will be shared across governing members of the Métis Nation and the Métis National Council as well as through existing collaborative health tables hosted by Métis government, who may choose to share it with their citizens. Traditional academic dissemination will also be pursued including peer-review publication and conference presentations, in line with the MNO's desire to contribute to closing the current gap in Métis health research. Findings from this scoping review will support strategic planning on health research across the Métis Nation.

**Author's Contributions:** SC, AJS, NT, RAB and SAE co-developed the idea for the scoping review. All authors reviewed, provided feedback, and approved the scoping review design, approach, search strategy and data extraction tables. HMB wrote and prepared the first draft of the scoping review protocol. All authors read and approved the manuscript. SC, SK, AJS, JM, MR and SS are citizens of the Métis Nation of Ontario, or are in the process of obtaining citizenship, and provided a Métis lens for the scoping review protocol.



1  
2  
3  
4  
5  
6  
7  
8  
9  
10  
11  
12  
13  
14  
15  
16  
17  
18  
19  
20  
21  
22  
23  
24  
25  
26  
27  
28  
29  
30  
31  
32  
33  
34  
35  
36  
37  
38  
39  
40  
41  
42  
43  
44  
45  
46  
47  
48  
49  
50  
51  
52  
53  
54  
55  
56  
57  
58  
59  
60

**Funding:** This research received no specific grant from any funding agency in the public, commercial or not-for-profit sectors.  
**Competing Interests:** None declared  
**Provenance and Peer Review:**  
**Data Sharing Statement:** No additional data available

For peer review only

## References

- Allan, B. & Smylie, J. (2015). First Peoples, second class treatment: The role of racism in the health and well-being of Indigenous peoples in Canada. Toronto, ON: the Wellesley Institute
- Arksey, H., & O'Malley, L. (2005). Scoping studies: towards a methodological framework. *International Journal of Social Research Methodology*, 8(1), 19–32. <https://doi.org/10.1080/1364557032000119616>
- Bassett, R., & McGibbon, E. (2013). A critical participatory and collaborative method for scoping the literature. *Quality & Quantity*, 47(6), 3249–3259. <https://doi.org/10.1007/s11135-012-9715-2>
- Covidence systematic review software, Veritas Health Innovation, Melbourne, Australia. [www.covidence.org](http://www.covidence.org).
- Desmarais, D. (2017). Spare a Thought for Métis Women Elders: Illness and Poverty in Elderhood. In J. Green (Ed.), *Making Space for Indigenous Feminism* (2nd Editio, pp. 192– 210). Fernwood Publishing.
- Evans, M., C. Anderson, D. Dietrich, C. Bourassa, T. Logan, L.D. Berg, and B. DeVolder. (2012). “Funding and ethics in Métis Community Based Research: The Complication of a Contemporary Context.” *International Journal of Critical Indigenous Studies*. 5(1): 54-66
- Fiola, C. (2012). Re-kindling the sacred fire: Métis ancestry, Anishinaabe spirituality and identity [Doctoral dissertation, Trent University]. ProQuest Dissertations and Theses.
- Iseke, J. M. (2010). Importance of Métis ways of knowing in healing communities. *Canadian Journal of Native Education*, 33(1), 83–97, 155
- Kirkness, V. J. and R. Barnhardt (2001). First Nations and Higher Education: The Four R's - Respect, Relevance, Reciprocity, Responsibility. *Knowledge Across Cultures: A Contribution to Dialogue Among Civilizations*. R. Hayoe and J. Pan. Hong Kong, Comparative Education Research Centre, The University of Hong Kong.
- Kumar, M. B., Wesche, S., & McGuire, C. (2012). Trends in Métis-related health research (1980-2009): Identification of research gaps. *Canadian Journal of Public Health*, 103(1), 23–28. <https://doi.org/10.1007/bf03404064>
- Membership in a Métis organization or Settlement: Findings from the 2021 Census of Population*. (2021). Retrieved January 24, 2023, from <https://www12.statcan.gc.ca/census-recensement/2021/as-sa/98-200-X/2021006/98-200-X2021006-eng.cfm>
- Métis Nation of Ontario | About the Métis of Ontario*. (2023). Retrieved September 17, 2021, from <https://www.metisnation.org/about-the-mno/>
- Métis Nation of Ontario | Registry | Métis of Ontario*. (2023). Retrieved January 24, 2023, from <https://www.metisnation.org/registry/>
- Munn, Z., Peters, M. D., Stern, C., Tufanaru, C., McArthur, A., & Aromataris, E. (2018). Systematic Review or scoping review? guidance for authors when choosing between a systematic or scoping review approach. *BMC Medical Research Methodology*, 18(1). <https://doi.org/10.1186/s12874-018-0611-x>

1  
2  
3 Page, M. J., & Moher, D. (2017). Evaluations of the uptake and impact of the preferred reporting items for  
4 systematic reviews and meta-analyses (PRISMA) statement and extensions: A scoping review. *Systematic*  
5 *Reviews*, 6(1). <https://doi.org/10.1186/s13643-017-0663-8>  
6

7 Peters, M. D. J., Godfrey, C. M., Khalil, H., McInerney, P., Parker, D., & Soares, C. B. (2015). Guidance for  
8 conducting systematic scoping reviews. *International Journal of Evidence-Based Healthcare*, 13(3), 141–  
9 146. <https://doi.org/10.1097/xeb.0000000000000050>  
10

11 *Principles of Ethical Métis Research - ACHH*. achh.ca. (2018). Retrieved March 9, 2023, from  
12 [https://achh.ca/wp-content/uploads/2018/07/Guide\\_Ethics\\_NAHOMetisCentre.pdf](https://achh.ca/wp-content/uploads/2018/07/Guide_Ethics_NAHOMetisCentre.pdf)  
13

14 Smylie, J. (2009). The health of Aboriginal peoples. In D. Raphael (Ed.), *Social determinants of health:*  
15 *Canadian perspectives* (pp. 280–301). Canadian Scholars Press.  
16  
17  
18  
19  
20  
21  
22  
23  
24  
25  
26  
27  
28  
29  
30  
31  
32  
33  
34  
35  
36  
37  
38  
39  
40  
41  
42  
43  
44  
45  
46  
47  
48  
49  
50  
51  
52  
53  
54  
55  
56  
57  
58  
59  
60

## Preferred Reporting Items for Systematic reviews and Meta-Analyses extension for Scoping Reviews (PRISMA-ScR) Checklist

| SECTION                                               | ITEM | PRISMA-ScR CHECKLIST ITEM                                                                                                                                                                                                                                                                                  | REPORTED ON PAGE # |
|-------------------------------------------------------|------|------------------------------------------------------------------------------------------------------------------------------------------------------------------------------------------------------------------------------------------------------------------------------------------------------------|--------------------|
| <b>TITLE</b>                                          |      |                                                                                                                                                                                                                                                                                                            |                    |
| Title                                                 | 1    | Identify the report as a scoping review.                                                                                                                                                                                                                                                                   |                    |
| <b>ABSTRACT</b>                                       |      |                                                                                                                                                                                                                                                                                                            |                    |
| Structured summary                                    | 2    | Provide a structured summary that includes (as applicable): background, objectives, eligibility criteria, sources of evidence, charting methods, results, and conclusions that relate to the review questions and objectives.                                                                              |                    |
| <b>INTRODUCTION</b>                                   |      |                                                                                                                                                                                                                                                                                                            |                    |
| Rationale                                             | 3    | Describe the rationale for the review in the context of what is already known. Explain why the review questions/objectives lend themselves to a scoping review approach.                                                                                                                                   |                    |
| Objectives                                            | 4    | Provide an explicit statement of the questions and objectives being addressed with reference to their key elements (e.g., population or participants, concepts, and context) or other relevant key elements used to conceptualize the review questions and/or objectives.                                  |                    |
| <b>METHODS</b>                                        |      |                                                                                                                                                                                                                                                                                                            |                    |
| Protocol and registration                             | 5    | Indicate whether a review protocol exists; state if and where it can be accessed (e.g., a Web address); and if available, provide registration information, including the registration number.                                                                                                             |                    |
| Eligibility criteria                                  | 6    | Specify characteristics of the sources of evidence used as eligibility criteria (e.g., years considered, language, and publication status), and provide a rationale.                                                                                                                                       |                    |
| Information sources*                                  | 7    | Describe all information sources in the search (e.g., databases with dates of coverage and contact with authors to identify additional sources), as well as the date the most recent search was executed.                                                                                                  |                    |
| Search                                                | 8    | Present the full electronic search strategy for at least 1 database, including any limits used, such that it could be repeated.                                                                                                                                                                            |                    |
| Selection of sources of evidence†                     | 9    | State the process for selecting sources of evidence (i.e., screening and eligibility) included in the scoping review.                                                                                                                                                                                      |                    |
| Data charting process‡                                | 10   | Describe the methods of charting data from the included sources of evidence (e.g., calibrated forms or forms that have been tested by the team before their use, and whether data charting was done independently or in duplicate) and any processes for obtaining and confirming data from investigators. |                    |
| Data items                                            | 11   | List and define all variables for which data were sought and any assumptions and simplifications made.                                                                                                                                                                                                     |                    |
| Critical appraisal of individual sources of evidence§ | 12   | If done, provide a rationale for conducting a critical appraisal of included sources of evidence; describe the methods used and how this information was used in any data synthesis (if appropriate).                                                                                                      |                    |
| Synthesis of results                                  | 13   | Describe the methods of handling and summarizing the data that were charted.                                                                                                                                                                                                                               |                    |

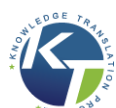

| SECTION                                       | ITEM | PRISMA-ScR CHECKLIST ITEM                                                                                                                                                                       | REPORTED ON PAGE # |
|-----------------------------------------------|------|-------------------------------------------------------------------------------------------------------------------------------------------------------------------------------------------------|--------------------|
| <b>RESULTS</b>                                |      |                                                                                                                                                                                                 |                    |
| Selection of sources of evidence              | 14   | Give numbers of sources of evidence screened, assessed for eligibility, and included in the review, with reasons for exclusions at each stage, ideally using a flow diagram.                    |                    |
| Characteristics of sources of evidence        | 15   | For each source of evidence, present characteristics for which data were charted and provide the citations.                                                                                     |                    |
| Critical appraisal within sources of evidence | 16   | If done, present data on critical appraisal of included sources of evidence (see item 12).                                                                                                      |                    |
| Results of individual sources of evidence     | 17   | For each included source of evidence, present the relevant data that were charted that relate to the review questions and objectives.                                                           |                    |
| Synthesis of results                          | 18   | Summarize and/or present the charting results as they relate to the review questions and objectives.                                                                                            |                    |
| <b>DISCUSSION</b>                             |      |                                                                                                                                                                                                 |                    |
| Summary of evidence                           | 19   | Summarize the main results (including an overview of concepts, themes, and types of evidence available), link to the review questions and objectives, and consider the relevance to key groups. |                    |
| Limitations                                   | 20   | Discuss the limitations of the scoping review process.                                                                                                                                          |                    |
| Conclusions                                   | 21   | Provide a general interpretation of the results with respect to the review questions and objectives, as well as potential implications and/or next steps.                                       |                    |
| <b>FUNDING</b>                                |      |                                                                                                                                                                                                 |                    |
| Funding                                       | 22   | Describe sources of funding for the included sources of evidence, as well as sources of funding for the scoping review. Describe the role of the funders of the scoping review.                 |                    |

JBI = Joanna Briggs Institute; PRISMA-ScR = Preferred Reporting Items for Systematic reviews and Meta-Analyses extension for Scoping Reviews.

\* Where *sources of evidence* (see second footnote) are compiled from, such as bibliographic databases, social media platforms, and Web sites.

† A more inclusive/heterogeneous term used to account for the different types of evidence or data sources (e.g., quantitative and/or qualitative research, expert opinion, and policy documents) that may be eligible in a scoping review as opposed to only studies. This is not to be confused with *information sources* (see first footnote).

‡ The frameworks by Arksey and O'Malley (6) and Levac and colleagues (7) and the JBI guidance (4, 5) refer to the process of data extraction in a scoping review as data charting.

§ The process of systematically examining research evidence to assess its validity, results, and relevance before using it to inform a decision. This term is used for items 12 and 19 instead of "risk of bias" (which is more applicable to systematic reviews of interventions) to include and acknowledge the various sources of evidence that may be used in a scoping review (e.g., quantitative and/or qualitative research, expert opinion, and policy document).

From: Tricco AC, Lillie E, Zarin W, O'Brien KK, Colquhoun H, Levac D, et al. PRISMA Extension for Scoping Reviews (PRISMA-ScR): Checklist and Explanation. *Ann Intern Med.* 2018;169:467–473. doi: [10.7326/M18-0850](https://doi.org/10.7326/M18-0850).

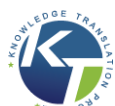

# BMJ Open

## Protocol for A Scoping Review of the Landscape of Métis Health and Wellness

|                                 |                                                                                                                                                                                                                                                                                                                                                                                                                                                                                                                                                                                                                                                                                                                  |
|---------------------------------|------------------------------------------------------------------------------------------------------------------------------------------------------------------------------------------------------------------------------------------------------------------------------------------------------------------------------------------------------------------------------------------------------------------------------------------------------------------------------------------------------------------------------------------------------------------------------------------------------------------------------------------------------------------------------------------------------------------|
| Journal:                        | <i>BMJ Open</i>                                                                                                                                                                                                                                                                                                                                                                                                                                                                                                                                                                                                                                                                                                  |
| Manuscript ID                   | bmjopen-2023-077868.R1                                                                                                                                                                                                                                                                                                                                                                                                                                                                                                                                                                                                                                                                                           |
| Article Type:                   | Protocol                                                                                                                                                                                                                                                                                                                                                                                                                                                                                                                                                                                                                                                                                                         |
| Date Submitted by the Author:   | 21-Dec-2023                                                                                                                                                                                                                                                                                                                                                                                                                                                                                                                                                                                                                                                                                                      |
| Complete List of Authors:       | Boutros, Helana Marie; Métis Nation of Ontario; McMaster University, Health, Society and Aging<br>Koprich, Sabastian; Métis Nation of Ontario; University of Toronto - St George Campus, Public Health<br>Simms, Abigail; Métis Nation of Ontario, Public Health<br>Tsui, Noel; Métis Nation of Ontario, Public Health<br>Boyle, Rose-Anne; Métis Nation of Ontario, Public Health<br>Harrison, Jen; Métis Nation of Ontario<br>Riddell, Melissa; Métis Nation of Ontario, Public Health<br>Sanftenberg , Santana ; Métis Nation of Ontario; Lakehead University<br>Cripps, Shelley; Métis Nation of Ontario<br>Edwards, Sarah; Métis Nation of Ontario<br>MNO, Métis Nation of Ontario; Métis Nation of Ontario |
| <b>Primary Subject Heading</b>: | Public health                                                                                                                                                                                                                                                                                                                                                                                                                                                                                                                                                                                                                                                                                                    |
| Secondary Subject Heading:      | Qualitative research                                                                                                                                                                                                                                                                                                                                                                                                                                                                                                                                                                                                                                                                                             |
| Keywords:                       | PUBLIC HEALTH, Health Literacy, EPIDEMIOLOGY, Health Services Accessibility, Primary Health Care, Health Education                                                                                                                                                                                                                                                                                                                                                                                                                                                                                                                                                                                               |
|                                 |                                                                                                                                                                                                                                                                                                                                                                                                                                                                                                                                                                                                                                                                                                                  |

SCHOLARONE™  
Manuscripts

1  
2  
3 Protocol for A Scoping Review of the Landscape of Métis Health and Wellness  
4

5 **Abbreviated Title:** Scoping Review Protocol on Métis Health  
6  
7  
8

9 Helana Marie Boutros (MPH)<sup>1,3,5\*</sup>, Sabastian Koprach (B.Sc.)<sup>1,2,3</sup>, Abigail J. Simms (MPH)<sup>1,3</sup>, Noel Tsui  
10 (MPH)<sup>1,3</sup>, Rose-Anne Boyle<sup>1</sup>, Jen Harrison<sup>1</sup>, Melissa Riddell<sup>1</sup>, Santana Sanftenberg<sup>1,4</sup>, Shelley Cripps<sup>1</sup>,  
11 Sarah A. Edwards (PhD)<sup>1,2,3</sup> and the Métis Nation of Ontario MNO<sup>1</sup>  
12

13 1 Métis Nation of Ontario, Ottawa, Ontario, Canada

14 2 Dalla Lana School of Public Health, University of Toronto, Ontario, Canada

15 3 ICES, Ontario, Canada

16 4 Lakehead University, Thunder Bay, Ontario, Canada

17 5 Department of Health, Society and Aging, McMaster University, Canada  
18  
19  
20

21 Emails : [boutrosh@mcmaster.ca](mailto:boutrosh@mcmaster.ca) (HMB), [s.koprach@mail.utoronto.ca](mailto:s.koprach@mail.utoronto.ca) (SK), [abigail.simms@ices.on.ca](mailto:abigail.simms@ices.on.ca)  
22 (AJS), [noel.tsui@ices.on.ca](mailto:noel.tsui@ices.on.ca) (NT), [rose-anneb@metisnation.org](mailto:rose-anneb@metisnation.org) (RB), [JenH@metisnation.org](mailto:JenH@metisnation.org)  
23 (JH), [melissar@metisnation.org](mailto:melissar@metisnation.org) (MR), [srsanfite@lakeheadu.ca](mailto:srsanfite@lakeheadu.ca) (SS), [shelleycr@metisnation.org](mailto:shelleycr@metisnation.org) (SC);  
24 [sarah.edwards@ices.on.ca](mailto:sarah.edwards@ices.on.ca) (SAE), [contactus@metisnation.org](mailto:contactus@metisnation.org) (MNO)  
25  
26

27 \*Corresponding Author  
28  
29

30 **ORCID identifiers:**

31 Helana Marie Boutros: 0009-0007-4185-5063

32 Sabastian Koprach: 0009-0009-9243-0393

33 Noel Tsui: 0000-0002-5202-6873

34 Abigail J Simms: 0003-2779-5037  
35  
36  
37  
38  
39  
40  
41  
42  
43  
44  
45  
46  
47  
48  
49  
50  
51  
52  
53  
54  
55  
56  
57  
58  
59  
60

## Protocol for a Scoping Review of the Landscape of Métis Health

### Abstract

**Introduction:** In Canada, Métis people are one of three distinct Indigenous peoples whose rights are recognized and affirmed in Section 35 of the federal *Constitution Act, 1982*. In line with Métis people having a unique culture, history, language and way of life, a distinctions-based approach is critical to understand the current landscape of Métis-specific health. In this paper, we present a scoping review protocol to describe this research landscape in Canada led by the Métis Nation of Ontario (MNO).

**Methods and analysis:** This scoping review protocol is reported in line with the PRISMA-ScR reporting guidelines and follows Arksey and O'Malley's scoping review methodology. We will search electronic databases (Scopus, MEDLINE, Embase, Web of Science, CINAHL, APA PsycINFO, Anthropology Plus, Bibliography of Indigenous Peoples of North America, Canadian Business and Current Affairs, Indigenous Studies Portal, Informit Indigenous Collection, Collaborative Indigenous Garden, PubMed, ProQuest), grey literature sources and reference lists from selected papers. Two reviewers (HMB and SK) will double-blind screen all titles/ abstracts and full-text studies for inclusion. Any health-related study or health report that includes a Métis-specific health, well-being, or Métis social determinant of health outcome will be included. Relevant variables will be extracted following an iterative process whereby the data charting will be reviewed and updated.

**Ethics and dissemination:** Findings from this scoping review will be shared back through the MNO's existing community-based communication channels. Traditional academic dissemination will also be pursued. Research ethics board approval is not required since data are from peer-reviewed publications or publicly shared health reports and knowledge translation products.

**Key words:** Métis, health, Indigenous health, FNIM, public health, health outcomes, social determinants of health

### Article Summary Section

#### Strengths and Limitations of This Study

- The methods, as well as all other parts of this scoping review, were designed in collaboration with Métis Nation of Ontario (MNO) Leadership and staff to ensure the data collected will be relevant to the vision of Métis health and wellness.
- The search strategy includes fourteen electronic databases, as well as a broad range of grey literature sources, including Métis Nation-related websites to identify health reports and knowledge translation products of relevance to this review.
- Due to the nature of scoping reviews, a critical appraisal of the literature will not be included in our analysis and discussion.



## Background

The Métis are a distinct Indigenous people with a unique history, culture, language, and way of life.[1] The Métis are one of three constitutionally recognized and distinct Indigenous Peoples in what is now Canada, and account for one third of the Indigenous population with a self-identifying population of 624,220.[2] Of the 624,220 who identify as Métis, 179,345 are Métis citizens represented by one of the five governments of the Canada-Métis Nation Accord across the homeland.[2] The Métis Nation is comprised of descendants of people born of mixed relations between First Nation women and European men who formed a distinct culture and established communities throughout Canada in Alberta, Ontario, British Columbia, Manitoba and Saskatchewan.[3-4] Specifically, the Métis Nation of Ontario (MNO) is the provincial governing body representing over 30,000 registered Métis citizens.[1] Currently, the MNO offers a number of programs and services to its citizens through its various branches.[1] In particular, the Healing and Wellness branch aims to support and advocate for the health needs of the Métis community in Ontario.[1]

Although Métis people are recognized as Indigenous people in the Canadian constitution, they are excluded from existing federal Indigenous-specific health policies and programs.[5-6] Meanwhile, historical policies such as residential schools and child welfare, notably the Sixties Scoop, attempted to assimilate Métis people in Canada.[7] Frequent disputes over jurisdiction eliminate Métis people from both mainstream and Indigenous-specific healthcare systems.[6] These discriminatory colonial practices have had a negative impact on health, identity, and way of life for Métis, including their ties to the land, governance and kinship systems.[8-9] These political actions have contributed to a lack of Métis-specific research and accessible and accurate data, resulting in health disparities compared to the non-Indigenous population in Canada.[6,10-11] Due to issues in data collection, pan-Indigenous approaches, which lump First Nations, Inuit, and Métis data together, the Métis story of health is often indistinguishable in these data sets.

Métis-specific health data is limited. The most recent literature review on Métis health only included publications up to 2009 and identified several gaps in Métis-specific health research.[12] Similar conclusions were drawn from a narrative review contextualizing Métis health and wellbeing. As such, an updated review of the landscape of Métis health is necessary to demonstrate the growth in Métis-specific research, support research, program and policy development, and to support the overall health and wellness of Métis people. Our work will expand on the only previously completed review of Métis health, by conducting a scoping review to capture Métis-specific health in what is now known as Canada.[12]

## Scoping Review Objectives

The primary objective of this scoping review is to describe the current landscape of Métis-specific health research in what is now known as Canada. Secondary objectives include identifying the proportion of studies that (a) were Métis-led or incorporated principles of ethical Métis research and (b) incorporated Métis determinants of health.[13] For the purpose of this scoping review, these objectives will be exploratory in nature.

## Methods and Analysis

A scoping review will be used to explore the current landscape of Métis health and wellness research.[14] This approach was chosen as it allowed us to take a broader look at Métis health and wellness as opposed to focusing on select outcomes.[15] Conducting a scoping review, since it is a form of knowledge synthesis, will capture developments in Métis health research across disciplines.[15] This scoping review will be fundamentally informed and supported by the MNO. The research relationship

1  
2  
3 with the MNO is prioritized throughout this work to ensure the scoping review is relevant to the interests  
4 of the MNO.[13,16-17] Ultimately, our goal is to capture more recently published Métis health and  
5 wellness research which can be used to inform future MNO-led research projects.[18]  
6  
7

## 8 **Protocol Design**

9

10 This scoping review followed Arksey and O'Malley's scoping review methodology.[14]  
11 According to this methodology, there are six different stages in developing a scoping review: (1)  
12 identifying the research question; (2) identifying relevant studies; (3) selecting studies; (4) charting the  
13 data; (5) collating, summarizing, and reporting the results and (6) consulting with relevant stakeholders.  
14 In our case, we will be consulting with our relevant stakeholder, the MNO, throughout the scoping review  
15 process. The Preferred Reporting Items for Systematic Reviews and Meta-Analysis will be used to report  
16 the search results.[19]  
17  
18

### 19 **Stage 1: Identifying the Research Question**

20

21 Through consultation with the MNO and the research team, the primary research question was  
22 co-conceived as: "What is the current landscape of Métis-specific health research in Canada?"  
23  
24

### 25 **Stage 2: Identifying Relevant Studies - *Search Strategy and Information Sources***

26

27 This stage will be iterative and will include reviewing the literature, refining the search strategy,  
28 and including further sources of evidence identified in reference lists from selected papers. Title and  
29 abstract review will precede the full-text review of the selected studies. The search strategy and inclusion  
30 and exclusion criteria have been co-developed and agreed on by the MNO and the research team. This  
31 study will be conducted between April 2023 and December 2023.  
32  
33

34 Identification of studies relevant to this review will be achieved by a structured search in the  
35 following electronic databases: Scopus, MEDLINE, Embase, Web of Science, CINAHL, APA  
36 PsycINFO, Anthropology Plus, Bibliography of Indigenous Peoples of North America, Canadian  
37 Business and Current Affairs, Indigenous Studies Portal, Informit Indigenous Collection, Collaborative  
38 Indigenous Garden, PubMed, ProQuest. The search strategy will be based on a systemic combination of  
39 keywords and Boolean operators AND/OR applied to each database. Key words for searches are as  
40 follows: ("Métis\*" OR "Métis Nation" OR "metis" OR "Métis-specific" OR "metis-specific" OR "mixed  
41 blood" OR "half-breed" OR "half breed" OR "voyageur") AND ("health\*" OR "healthcare\*" OR  
42 "healthcare" OR "health services" OR "well being" OR "wellbeing\*" OR "well-being" OR "wellness\*" OR  
43 "mental health" OR "medic\*" OR "illness" OR "disease\*" OR "condition" OR "healthy behaviours"  
44 OR "community wellbeing" OR "community well-being" OR "community well being" OR "community  
45 wellness"). The search will be limited to articles published in the English language studies from 1980 to  
46 present date. Search results will be downloaded as ris files and imported into Covidence to store and  
47 manage papers.[20]  
48  
49

50 To ensure that relevant information is captured for the landscape of Métis health, a variety of  
51 literature sources (e.g., Indigenous Studies Portal and Collaborative Indigenous Garden), as well as  
52 Google (first 100 hits), will be searched to identify published articles and reports that are relevant to this  
53 scoping review. Furthermore, a hand search will be conducted on all Métis Nation-related websites to  
54 identify health reports and health deliverables of relevance to this review. Forward and backward citation  
55  
56  
57  
58  
59

1  
2  
3 searches of all included documents will be conducted to identify additional studies that also meet the  
4 scoping review's inclusion criteria.  
5  
6

7  
8 Similar to the academic literature search, the grey literature search terms will be determined by  
9 the MNO and the research team. The search strategy for databases and grey literature will also be  
10 developed by the research team with iterative input from the MNO collaborators.

### 11 **Stage 3: Study Selection**

12  
13 The review process will consist of two levels of screening: (1) a title and abstract review and (2)  
14 full-text review. Two researchers (HMB and SK) will double blind screen the title and abstract of all  
15 imported citations and assess whether to include them, based on the set inclusion and exclusion criteria.  
16 Duplicates will be removed by Covidence prior to starting title/abstract screening and screeners will  
17 manually remove duplicates if appropriate. All studies that were included by both reviewers will undergo  
18 full-text review. In the second step, the two reviewers will independently review the full-texts against the  
19 inclusion and exclusion criteria. At this point, any discordant full-text studies will be reviewed again, in  
20 which both researchers will verbally be discussing their rationale for including or excluding these studies  
21 and resolving discordant votes on Covidence. If full consensus is not obtained regarding study inclusion  
22 and exclusion, a third reviewer (AJS) will resolve any disagreement.  
23  
24

#### 25 *Inclusion criteria:*

- 26 • Published in the English language between 1980 and to present date.
- 27 • Include an identified Métis population (i.e., Can include self-identified, registered Métis,  
28 disaggregated reporting if pan-Indigenous and absence of Métis-specific health outcomes) across  
29 any age group.
- 30 • Examine a health, wellbeing, or Métis social determinant of health outcome.  
31

#### 32 *Exclusion criteria:*

- 33 • Pan-Indigenous (i.e., data is not disaggregated) or non-Métis population
- 34 • Not a health-related study (e.g., language or legal paper)
- 35 • Published in languages other than English due to the limited resources for translation.
- 36 • Published earlier than 1980.  
37  
38

### 39 **Stage 4: Data Collection**

40  
41 Study characteristics, as determined by the MNO and research team, will be extracted and  
42 summarized in a charting table for full-text studies, relevant forward and backward citations of full-text  
43 studies (snowballed studies), as well as hand searched Métis Nation-related health reports and other  
44 deliverables. The team will follow an iterative process (through monthly meetings and email  
45 correspondence) whereby the data charting will be reviewed, refined, and continually updated on an Excel  
46 spreadsheet document. Relevant variables will be extracted, including, but not limited to: author(s), year  
47 of publication, journal of publication, the peer-review article being published open or closed access, year  
48 of data collected, aims/ purpose, study population and size, methodology (e.g., quantitative, qualitative,  
49 Métis methodologies), observation or intervention study, health context (e.g., primary healthcare setting,  
50 community setting, etc.), health outcome(s) studies, Métis-led/collaborative partnership/use of ethical  
51 principles of Métis research (e.g., the extent that research is Métis-led as opposed to led by government,  
52 for instance), description of Métis identity (e.g. self-identified or citizenship), Métis-authorship (e.g., the  
53 observance of one or more Métis authors in the literature) the presence of strength-based versus deficit-  
54 based approaches, incorporation of Métis social determinants of health and Métis vision of health (e.g.,  
55  
56  
57  
58  
59  
60

1  
2  
3 how literature is defining health, how these determinants are described in the literature and how they  
4 resonate across nations, irrespective of the formal document), and gaps and trajectories in the research.  
5

6 With respect to grey literature, study characteristics extracted will include, but may not be  
7 limited to, hit result number, title, and health outcome. Data extraction will be conducted by one  
8 researcher and data will be compiled in Microsoft Excel spreadsheet for coding.  
9

## 10 **Stage 5: Data Summary and Synthesis of Results**

11  
12 Since a scoping review aims to map key concepts and clarify conceptual boundaries of a topic or  
13 field, this scoping review will not be critically appraising the studies included.[14.15] Rather, this scoping  
14 review will provide an overview of all included studies.[14.15] Data will be conceptualized and  
15 condensed from data extraction tables for a narrative report of available data on the following themes:  
16 Métis populations studied, if the eligibility criteria was based on self-identification or Métis citizenship, if  
17 studies are Métis-specific or pan-Indigenous, health outcomes studied, region of study, study design, the  
18 extent to which studies were Métis-led or incorporated principles of ethical Métis research and  
19 incorporated Métis determinants of health. Results of full-text, snowballed results, hand-searched health  
20 reports and grey literature will be aggregated together and reported.[14]  
21  
22

## 23 **Stage 6: Consultation**

24  
25 The MNO has a data-sharing agreement with ICES (formerly the Institute for Clinical Evaluative  
26 Sciences) wherein ICES staff are seconded to the MNO and work exclusively on MNO health and  
27 wellness research at the direction of the MNO. This scoping review was co-conceived within this  
28 partnership. The research team includes MNO staff members, MNO citizens and non-Métis ICES  
29 researchers seconded to support Métis-driven research. To address the landscape of Métis health, the  
30 research team iteratively developed the research question, objectives, and search strategy, and will co-  
31 interpret the results throughout the entire research process; this will ensure that the research is strengths-  
32 based and for the collective benefit of Métis people and communities.  
33  
34

## 35 **Dissemination and Ethics**

36  
37 The MNO secretariat approved the study prior to commencement. Research ethics board approval  
38 is not required since data are from peer-reviewed publications or publicly shared reports and health  
39 deliverables. Findings from this scoping review will be shared back through the MNO's existing  
40 communication channels including their website, social media accounts, MNO Voyageur newspaper, and  
41 community gatherings. The research team will work closely with the MNO's communications team to  
42 develop knowledge products targeted to MNO citizens. Results will be shared across governing members  
43 of the Métis Nation and the Métis National Council as well as through existing collaborative health tables  
44 hosted by Métis government, who may choose to share it with their citizens. Traditional academic  
45 dissemination will also be pursued including peer-review publication and conference presentations, in line  
46 with the MNO's desire to contribute to closing the current gap in Métis health research. Findings from  
47 this scoping review will support strategic planning on health research across the Métis Nation.  
48  
49  
50  
51  
52  
53  
54  
55  
56  
57  
58  
59

## Author's Contributions

**Helana Marie Boutros:** wrote and prepared the first draft of the scoping review protocol; reviewed, provided feedback, and approved the scoping review design, approach, search strategy and data extraction tables; read and approved the manuscript.

**Sabastian Koprlich:** reviewed, provided feedback, and approved the scoping review design, approach, search strategy and data extraction tables; read and approved the manuscript.

**Abigail J. Simms:** co-developed the idea for the scoping review; reviewed, provided feedback, and approved the scoping review design, approach, search strategy and data extraction tables; read and approved the manuscript.

**Noel Tsui:** co-developed the idea for the scoping review; reviewed, provided feedback, and approved the scoping review design, approach, search strategy and data extraction tables; read and approved the manuscript.

**Rose-Anne Boyle:** co-developed the idea for the scoping review; reviewed, provided feedback, and approved the scoping review design, approach, search strategy and data extraction tables; read and approved the manuscript.

**Jen Harrison:** reviewed, provided feedback, and approved the scoping review design, approach, search strategy and data extraction tables; read and approved the manuscript.

**Melissa Riddell:** reviewed, provided feedback, and approved the scoping review design, approach, search strategy and data extraction tables; read and approved the manuscript.

**Santana Sanftenberg:** reviewed, provided feedback, and approved the scoping review design, approach, search strategy and data extraction tables; read and approved the manuscript.

**Shelley Cripps:** co-developed the idea for the scoping review; reviewed, provided feedback, and approved the scoping review design, approach, search strategy and data extraction tables; read and approved the manuscript.

**Sarah A. Edwards:** co-developed the idea for the scoping review; reviewed, provided feedback, and approved the scoping review design, approach, search strategy and data extraction tables; read and approved the manuscript.

**Métis Nation of Ontario:** co-developed the idea for the scoping review; reviewed, provided feedback, and approved the scoping review design, approach, search strategy and data extraction tables; read and approved the manuscript.

**Positionality:** Shelley Cripps, Sabastian Koprlich, Abigail J. Simms, Jen Harrison, Melissa Riddell and Santana Sanftenberg are citizens of the Métis Nation of Ontario, or are in the process of obtaining citizenship, and provided a Métis lens for the scoping review protocol.

**Funding:** This research received no specific grant from any funding agency in the public, commercial or not-for-profit sectors.

**Patient and Public Involvement Statement:** None

**Competing Interests:** None declared

**Provenance and Peer Review:**

**Data Sharing Statement:** No additional data available

## References

1. *Métis Nation of Ontario | About the Métis of Ontario*. (2023). Retrieved September 17, 2021, from <https://www.metisnation.org/about-the-mno/>
2. *Membership in a Métis organization or Settlement: Findings from the 2021 Census of Population*. (2021). Retrieved January 24, 2023, from <https://www12.statcan.gc.ca/census-recensement/2021/as-sa/98-200-X/2021006/98-200-X2021006-eng.cfm>
3. Métis National Council. (2023) *About Us*. <https://www.metisnation.ca/about/about-us>
4. *Métis Nation of Ontario | Registry | Métis of Ontario*. (2023). Retrieved January 24, 2023, from <https://www.metisnation.org/registry/>
5. Desmarais, D. (2017). Spare a Thought for Métis Women Elders: Illness and Poverty in Elderhood. In J. Green (Ed.), *Making Space for Indigenous Feminism* (2nd Editio, pp. 192– 210). Fernwood Publishing.
6. *Métis Nation of Ontario | A Vision for Health*. (2023). Retrieved September 17, 2021, from <https://www.metisnation.ca/uploads/documents/3-1>
7. Allan, B. & Smylie, J. (2015). *First Peoples, second class treatment: The role of racism in the health and well-being of Indigenous peoples in Canada*. Toronto, ON: the Wellesley Institute
8. Fiola, C. (2012). *Re-kindling the sacred fire: Métis ancestry, Anishinaabe spirituality and identity* [Doctoral dissertation, Trent University]. ProQuest Dissertations and Theses.
9. Iseke, J. M. (2010). Importance of Métis ways of knowing in healing communities. *Canadian Journal of Native Education*, 33(1), 83–97, 155
10. Evans, M., C. Anderson, D. Dietrich, C. Bourassa, T. Logan, L.D. Berg, and B. DeVolder. (2012). “Funding and ethics in Métis Community Based Research: The Complication of a Contemporary Context.” *International Journal of Critical Indigenous Studies*. 5(1): 54-66
11. Smylie, J. (2009). The health of Aboriginal peoples. In D. Raphael (Ed.), *Social determinants of health: Canadian perspectives* (pp. 280–301). Canadian Scholars Press.
12. Kumar, M. B., Wesche, S., & McGuire, C. (2012). Trends in Métis-related health research (1980-2009): Identification of research gaps. *Canadian Journal of Public Health*, 103(1), 23–28. <https://doi.org/10.1007/bf03404064>
13. *Principles of Ethical Métis Research - ACHH*. achh.ca. (2018). Retrieved March 9, 2023, from [https://achh.ca/wp-content/uploads/2018/07/Guide\\_Ethics\\_NAHOMetisCentre.pdf](https://achh.ca/wp-content/uploads/2018/07/Guide_Ethics_NAHOMetisCentre.pdf)
14. Arksey, H., & O’Malley, L. (2005). Scoping studies: towards a methodological framework. *International Journal of Social Research Methodology*, 8(1), 19–32. <https://doi.org/10.1080/1364557032000119616>
15. Peters, M. D. J., Godfrey, C. M., Khalil, H., McInerney, P., Parker, D., & Soares, C. B. (2015). Guidance for conducting systematic scoping reviews. *International Journal of Evidence-Based Healthcare*, 13(3), 141–146. <https://doi.org/10.1097/xeb.0000000000000050>
16. Bassett, R., & McGibbon, E. (2013). A critical participatory and collaborative method for scoping the literature. *Quality & Quantity*, 47(6), 3249–3259. <https://doi.org/10.1007/s11135-012-9715-2>
17. Kirkness, V. J. and R. Barnhardt (2001). *First Nations and Higher Education: The Four R's - Respect, Relevance, Reciprocity, Responsibility. Knowledge Across Cultures: A Contribution to Dialogue Among Civilizations*. R. Hayoe and J. Pan. Hong Kong, Comparative Education Research Centre, The University of Hong Kong.
18. Munn, Z., Peters, M. D., Stern, C., Tufanaru, C., McArthur, A., & Aromataris, E. (2018). Systematic Review or scoping review? guidance for authors when choosing between a systematic or scoping review approach. *BMC Medical Research Methodology*, 18(1). <https://doi.org/10.1186/s12874-018-0611-x>

- 1
  - 2
  - 3
  - 4
  - 5
  - 6
  - 7
  - 8
  - 9
  - 10
  - 11
  - 12
  - 13
  - 14
  - 15
  - 16
  - 17
  - 18
  - 19
  - 20
  - 21
  - 22
  - 23
  - 24
  - 25
  - 26
  - 27
  - 28
  - 29
  - 30
  - 31
  - 32
  - 33
  - 34
  - 35
  - 36
  - 37
  - 38
  - 39
  - 40
  - 41
  - 42
  - 43
  - 44
  - 45
  - 46
  - 47
  - 48
  - 49
  - 50
  - 51
  - 52
  - 53
  - 54
  - 55
  - 56
  - 57
  - 58
  - 59
  - 60
19. Page, M. J., & Moher, D. (2017). Evaluations of the uptake and impact of the preferred reporting items for systematic reviews and meta-analyses (PRISMA) statement and extensions: A scoping review. *Systematic Reviews*, 6(1). <https://doi.org/10.1186/s13643-017-0663-8>
20. Covidence systematic review software, Veritas Health Innovation, Melbourne, Australia. [www.covidence.org](http://www.covidence.org).

For peer review only

## Appendix

### Search Strategy

#### Databases

| Scopus               |                                                                                                                                                                                                                                                                                                                                                                                                                                                                                                                                                                                                                                                                                                                                                                                                                                                       |
|----------------------|-------------------------------------------------------------------------------------------------------------------------------------------------------------------------------------------------------------------------------------------------------------------------------------------------------------------------------------------------------------------------------------------------------------------------------------------------------------------------------------------------------------------------------------------------------------------------------------------------------------------------------------------------------------------------------------------------------------------------------------------------------------------------------------------------------------------------------------------------------|
| Search Query 1 AND 2 | TITLE-ABS-KEY(( "metis" OR "Métis*" OR "Métis Nation" OR "Métis-specific" OR "metis-specific" OR "mixed blood" OR "half-breed" OR "half breed" OR "voyageur") AND ("health*" OR "healthcare*" OR "healthcare" OR "health services" OR "well being" OR "wellbeing*" OR "well-being" OR "wellness*" OR "mental health" OR "medic*" OR "illness" OR "disease*" OR "condition" OR "healthy behaviours" OR "community wellbeing" OR "community well-being" OR "community well being" OR "community wellness")) AND PUBYEAR >1979 AND (LIMIT-TO (LANGUAGE, "English"))                                                                                                                                                                                                                                                                                      |
| Search Query 1 AND 3 | TITLE-ABS-KEY(( "metis" OR "Métis*" OR "Métis Nation" OR "Métis-specific" OR "metis-specific" OR "mixed blood" OR "half-breed" OR "half breed" OR "voyageur") AND ( "Income" OR "social status" OR "poverty" OR "housing" OR "racism" OR "colonialism" OR "employment" OR "working conditions" OR "education" OR "literacy" OR "childhood experiences" OR "physical environment" OR "social supports" OR "community supports" OR "coping skills" OR "gender" OR "culture" OR "land" OR "animals" OR "water*" )) AND PUBYEAR >1979 AND (LIMIT-TO (LANGUAGE, "English"))                                                                                                                                                                                                                                                                                |
| Medline              |                                                                                                                                                                                                                                                                                                                                                                                                                                                                                                                                                                                                                                                                                                                                                                                                                                                       |
| Search Query 1 AND 2 | (( "metis" OR "Métis*" OR "Métis Nation" OR "Métis-specific" OR "metis-specific" OR "mixed blood" OR "half-breed" OR "half breed" OR "voyageur") AND ("health*" OR "healthcare*" OR "healthcare" OR "health services" OR "well being" OR "wellbeing*" OR "well-being" OR "wellness*" OR "mental health" OR "medic*" OR "illness" OR "disease*" OR "condition" OR "healthy behaviours" OR "community wellbeing" OR "community well-being" OR "community well being" OR "community wellness")). mp. [mp=title, book title, abstract, original title, name of substance word, subject heading word, floating sub-heading word, keyword heading, organism supplementary concept word, protocol supplementary concept, rare disease supplementary concept word, unique identifier, synonyms]<br><br>limit to (english language and yr ="1980-2023")        |
| Search Query 1 AND 3 | (( "metis" OR "Métis*" OR "Métis Nation" OR "Métis-specific" OR "metis-specific" OR "mixed blood" OR "half-breed" OR "half breed" OR "voyageur") AND ( "Income" OR "social status" OR "poverty" OR "housing" OR "racism" OR "colonialism" OR "employment" OR "working conditions" OR "education" OR "literacy" OR "childhood experiences" OR "physical environment" OR "social supports" OR "community supports" OR "coping skills" OR "gender" OR "culture" OR "land" OR "animals" OR "water*" ))). mp. [mp=title, book title, abstract, original title, name of substance word, subject heading word, floating sub-heading word, keyword heading, organism supplementary concept word, protocol supplementary concept, rare disease supplementary concept word, unique identifier, synonyms]<br><br>limit to (english language and yr ="1980-2023") |



| Embase               |                                                                                                                                                                                                                                                                                                                                                                                                                                                                                                                                                                                                                                                                                                                                                      |
|----------------------|------------------------------------------------------------------------------------------------------------------------------------------------------------------------------------------------------------------------------------------------------------------------------------------------------------------------------------------------------------------------------------------------------------------------------------------------------------------------------------------------------------------------------------------------------------------------------------------------------------------------------------------------------------------------------------------------------------------------------------------------------|
| Search Query 1 AND 2 | <p>(( "metis" OR "Métis*" OR "Métis Nation" OR "Métis-specific" OR "metis-specific" OR "mixed blood" OR "half-breed" OR "half breed" OR "voyageur") AND ("health*" OR "healthcare*" OR "healthcare" OR "health services" OR "well being" OR "wellbeing*" OR "well-being" OR "wellness*" OR "mental health" OR "medic*" OR "illness" OR "disease*" OR "condition" OR "healthy behaviours" OR "community wellbeing" OR "community well-being" OR "community well being" OR "community wellness")). mp. [mp=title, abstract, heading word, drug trade name, original title, drug manufacturer, device trade name, keyword heading word, floating subheading word, candidate term word]</p> <p>limit to (english language and yr ="1980-2023")</p>       |
| Search Query 1 AND 3 | <p>(( "metis" OR "Métis*" OR "Métis Nation" OR "Métis-specific" OR "metis-specific" OR "mixed blood" OR "half-breed" OR "half breed" OR "voyageur") AND ( "Income" OR "social status" OR "poverty" OR "housing" OR "racism" OR "colonialism" OR "employment" OR "working conditions" OR "education" OR "literacy" OR "childhood experiences" OR "physical environment" OR "social supports" OR "community supports" OR "coping skills" OR "gender" OR "culture" OR "land" OR "animals" OR "water*" )). mp. [mp=title, abstract, heading word, drug trade name, original title, drug manufacturer, device trade name, keyword heading word, floating subheading word, candidate term word]</p> <p>limit to (english language and yr ="1980-2023")</p> |
| Web of Science       |                                                                                                                                                                                                                                                                                                                                                                                                                                                                                                                                                                                                                                                                                                                                                      |
| Search Query 1 AND 2 | <p>( "metis" OR "Métis*" OR "Métis Nation" OR "Métis-specific" OR "metis-specific" OR "mixed blood" OR "half-breed" OR "half breed" OR "voyageur") AND ("health*" OR "healthcare*" OR "healthcare" OR "health services" OR "well being" OR "wellbeing*" OR "well-being" OR "wellness*" OR "mental health" OR "medic*" OR "illness" OR "disease*" OR "condition" OR "healthy behaviours" OR "community wellbeing" OR "community well-being" OR "community well being" OR "community wellness")</p> <p>limit to English; no publication filter (earliest was 1992)</p>                                                                                                                                                                                 |
| Search Query 1 AND 3 | <p>( "metis" OR "Métis*" OR "Métis Nation" OR "Métis-specific" OR "metis-specific" OR "mixed blood" OR "half-breed" OR "half breed" OR "voyageur") AND ( "Income" OR "social status" OR "poverty" OR "housing" OR "racism" OR "colonialism" OR "employment" OR "working conditions" OR "education" OR "literacy" OR "childhood experiences" OR "physical environment" OR "social supports" OR "community supports" OR "coping skills" OR "gender" OR "culture" OR "land" OR "animals" OR "water*" )</p> <p>limit to English; no publication filter (earliest was 1991)</p>                                                                                                                                                                           |
| CINAHL               |                                                                                                                                                                                                                                                                                                                                                                                                                                                                                                                                                                                                                                                                                                                                                      |
| Search Query 1 AND 2 | <p>AB ( "metis" OR "Métis*" OR "Métis Nation" OR "Métis-specific" OR "metis-specific" OR "mixed blood" OR "half-breed" OR "half breed" OR "voyageur") AND AB ("health*" OR "healthcare*" OR "healthcare" OR "health services" OR "well being" OR "wellbeing*" OR "well-being" OR "wellness*" OR "mental health" OR "medic*" OR "illness" OR "disease*"</p>                                                                                                                                                                                                                                                                                                                                                                                           |

|                          |                                                                                                                                                                                                                                                                                                                                                                                                                                                                                                                                                                                                                                                                                |
|--------------------------|--------------------------------------------------------------------------------------------------------------------------------------------------------------------------------------------------------------------------------------------------------------------------------------------------------------------------------------------------------------------------------------------------------------------------------------------------------------------------------------------------------------------------------------------------------------------------------------------------------------------------------------------------------------------------------|
|                          | OR "condition" OR "healthy behaviours" OR "community wellbeing" OR "community well-being" OR "community well being" OR "community wellness")<br><br>Abstract Available, Published Date: 1980, English language<br>Boolean/ Phrase                                                                                                                                                                                                                                                                                                                                                                                                                                              |
| Search Query 1 AND 3     | AB ( "metis" OR "Métis*" OR "Métis Nation" OR "Métis-specific" OR "metis-specific" OR "mixed blood" OR "half-breed" OR "half breed" OR "voyageur") AND AB ( "Income" OR "social status" OR "poverty" OR "housing" OR "racism" OR "colonialism" OR "employment" OR "working conditions" OR "education" OR "literacy" OR "childhood experiences" OR "physical environment" OR "social supports" OR "community supports" OR "coping skills" OR "gender" OR "culture" OR "land" OR "animals" OR "water*" )<br><br>Abstract Available, Published Date: 1980, English language<br>Boolean/ Phrase                                                                                    |
| <b>APA Psych Info</b>    |                                                                                                                                                                                                                                                                                                                                                                                                                                                                                                                                                                                                                                                                                |
| Search Query 1 AND 2     | (( "metis" or "Métis*" or "Métis Nation" or "Métis-specific" or "metis-specific" or "mixed blood" or "half-breed" or "half breed" or "voyageur") and ("health*" or "healthcare*" or "healthcare" or "health services" or "well being" or "wellbeing*" or "well-being" or "wellness*" or "mental health" or "medic*" or "illness" or "disease*" or "condition" or "healthy behaviours" or "community wellbeing" or "community well-being" or "community well being" or "community wellness")).mp. [mp=title, abstract, heading word, table of contents, key concepts, original title, tests & measures, mesh word]<br><br>limit to (english language and yr ="1980-2023")       |
| Search Query 1 AND 3     | (( "metis" or "Métis*" or "Métis Nation" or "Métis-specific" or "metis-specific" or "mixed blood" or "half-breed" or "half breed" or "voyageur") and ( "Income" OR "social status" OR "poverty" OR "housing" OR "racism" OR "colonialism" OR "employment" OR "working conditions" OR "education" OR "literacy" OR "childhood experiences" OR "physical environment" OR "social supports" OR "community supports" OR "coping skills" OR "gender" OR "culture" OR "land" OR "animals" OR "water*" )).mp. [mp=title, abstract, heading word, table of contents, key concepts, original title, tests & measures, mesh word]<br><br>limit to (english language and yr ="1980-2023") |
| <b>Anthropology Plus</b> |                                                                                                                                                                                                                                                                                                                                                                                                                                                                                                                                                                                                                                                                                |
| Search Query 1 AND 2     | TX ( "metis" OR "Métis*" OR "Métis Nation" OR "Métis-specific" OR "metis-specific" OR "mixed blood" OR "half-breed" OR "half breed" OR "voyageur") AND TX ("health*" OR "healthcare*" OR "healthcare" OR "health services" OR "well being" OR "wellbeing*" OR "well-being" OR "wellness*" OR "mental health" OR "medic*" OR "illness" OR "disease*" OR "condition" OR "healthy behaviours" OR "community wellbeing" OR "community well-being" OR "community well being" OR "community wellness")<br><br>limit to (english language and yr ="1980-2023")<br>Boolean/ Phrase                                                                                                     |

|                                              |                                                                                                                                                                                                                                                                                                                                                                                                                                                                                                                                                                                  |
|----------------------------------------------|----------------------------------------------------------------------------------------------------------------------------------------------------------------------------------------------------------------------------------------------------------------------------------------------------------------------------------------------------------------------------------------------------------------------------------------------------------------------------------------------------------------------------------------------------------------------------------|
| Search Query 1 AND 3                         | TX ( "metis" OR "Métis*" OR "Métis Nation" OR "Métis-specific" OR "metis-specific" OR "mixed blood" OR "half-breed" OR "half breed" OR "voyageur") AND TX ( "Income" OR "social status" OR "poverty" OR "housing" OR "racism" OR "colonialism" OR "employment" OR "working conditions" OR "education" OR "literacy" OR "childhood experiences" OR "physical environment" OR "social supports" OR "community supports" OR "coping skills" OR "gender" OR "culture" OR "land" OR "animals" OR "water*" )<br><br>limit to (english language and yr ="1980-2023")<br>Boolean/ Phrase |
| <b>Bibliography of Indigenous Peoples</b>    |                                                                                                                                                                                                                                                                                                                                                                                                                                                                                                                                                                                  |
| Search Query 1 AND 2                         | AB ( "metis" OR "Métis*" OR "Métis Nation" OR "Métis-specific" OR "metis-specific" OR "mixed blood" OR "half-breed" OR "half breed" OR "voyageur") AND AB ("health*" OR "healthcare*" OR "healthcare" OR "health services" OR "well being" OR "wellbeing*" OR "well-being" OR "wellness*" OR "mental health" OR "medic*" OR "illness" OR "disease*" OR "condition" OR "healthy behaviours" OR "community wellbeing" OR "community well-being" OR "community well being" OR "community wellness")<br><br>limit to (english language and yr ="1980-2023")<br>Boolean/ Phrase       |
| Search Query 1 AND 3                         | AB ( "metis" OR "Métis*" OR "Métis Nation" OR "Métis-specific" OR "metis-specific" OR "mixed blood" OR "half-breed" OR "half breed" OR "voyageur") AND AB ( "Income" OR "social status" OR "poverty" OR "housing" OR "racism" OR "colonialism" OR "employment" OR "working conditions" OR "education" OR "literacy" OR "childhood experiences" OR "physical environment" OR "social supports" OR "community supports" OR "coping skills" OR "gender" OR "culture" OR "land" OR "animals" OR "water*" )<br><br>limit to (english language and yr ="1980-2023")<br>Boolean/ Phrase |
| <b>Canadian Business and Current Affairs</b> |                                                                                                                                                                                                                                                                                                                                                                                                                                                                                                                                                                                  |
| Search Query 1 AND 2                         | summary ( "metis" OR "Métis*" OR "Métis Nation" OR "Métis-specific" OR "metis-specific" OR "mixed blood" OR "half-breed" OR "half breed" OR "voyageur") AND summary ("health*" OR "healthcare*" OR "healthcare" OR "health services" OR "well being" OR "wellbeing*" OR "well-being" OR "wellness*" OR "mental health" OR "medic*" OR "illness" OR "disease*" OR "condition" OR "healthy behaviours" OR "community wellbeing" OR "community well-being" OR "community well being" OR "community wellness")<br><br>limit to (english language and yr ="1980-2023")                |
| Search Query 1 AND 3                         | summary ( "metis" OR "Métis*" OR "Métis Nation" OR "Métis-specific" OR "metis-specific" OR "mixed blood" OR "half-breed" OR "half breed" OR "voyageur") AND summary ( "Income" OR "social status" OR "poverty" OR "housing" OR "racism" OR "colonialism" OR "employment" OR "working conditions" OR "education" OR "literacy" OR "childhood experiences" OR "physical environment" OR "social supports" OR "community supports" OR "coping skills" OR "gender" OR "culture" OR "land" OR "animals" OR "water*" )                                                                 |

|                                       |                                                                                                                                                                                                                                                                                                                                                                                                                                                                                                                                                                                                                                                                                                                                                                                                                                                                                                                                                                                                                                                                                                                                                                                                                                                                                                                                                                            |
|---------------------------------------|----------------------------------------------------------------------------------------------------------------------------------------------------------------------------------------------------------------------------------------------------------------------------------------------------------------------------------------------------------------------------------------------------------------------------------------------------------------------------------------------------------------------------------------------------------------------------------------------------------------------------------------------------------------------------------------------------------------------------------------------------------------------------------------------------------------------------------------------------------------------------------------------------------------------------------------------------------------------------------------------------------------------------------------------------------------------------------------------------------------------------------------------------------------------------------------------------------------------------------------------------------------------------------------------------------------------------------------------------------------------------|
|                                       | limit to (english language and yr ="1980-2023")                                                                                                                                                                                                                                                                                                                                                                                                                                                                                                                                                                                                                                                                                                                                                                                                                                                                                                                                                                                                                                                                                                                                                                                                                                                                                                                            |
| <b>Informit Indigenous Collection</b> |                                                                                                                                                                                                                                                                                                                                                                                                                                                                                                                                                                                                                                                                                                                                                                                                                                                                                                                                                                                                                                                                                                                                                                                                                                                                                                                                                                            |
| Search Query 1 AND 2                  | [Abstract:"metis" OR "Métis*" OR "Métis Nation" OR "Métis-specific" OR "metis-specific" OR "mixed blood" OR "half-breed" OR "half breed" OR "voyageur" OR Abstract:"health*" OR "healthcare*" OR "healthcare" OR "health services" OR "well being" OR "wellbeing*" OR "well-being" OR "wellness*" OR "mental health" OR "medic*" OR "illness" OR "disease*" OR "condition" OR "healthy behaviours" OR "community wellbeing" OR "community well-being" OR "community well being" OR "community wellness" OR Abstract: 'métis nation' OR Abstract: 'métis-specific' OR Abstract: 'metis-specific' OR Abstract: 'mixed blood' OR Abstract: 'half-breed' OR Abstract: 'half breed' OR Abstract: 'voyageur'] AND [Abstract: 'health*' OR Abstract: 'healthcare*' OR Abstract: 'healthcare' OR Abstract: 'health services' OR Abstract: 'well being' OR Abstract: 'wellbeing*' OR Abstract: 'well-being' OR Abstract: 'wellness*' OR Abstract: 'mental health' OR Abstract: 'medic*' OR Abstract: 'illness' OR Abstract: 'disease*' OR Abstract: 'condition' OR Abstract: 'healthy behaviours' OR Abstract: 'community wellbeing' OR Abstract: 'community well-being' OR Abstract: 'community well being' OR Abstract: 'community wellness'] AND Publication Date: (01/01/1980 TO 12/31/2023)<br><br>limit to (english language and yr ="1980-2023")                             |
| Search Query 1 AND 3                  | [Abstract:"metis" OR "Métis*" OR "Métis Nation" OR "Métis-specific" OR "metis-specific" OR "mixed blood" OR "half-breed" OR "half breed" OR "voyageur" OR Abstract:"Income" OR "social status" OR "poverty" OR "housing" OR "racism" OR "colonialism" OR "employment" OR "working conditions" OR "education" OR "literacy" OR "childhood experiences" OR "physical environment" OR "social supports" OR "community supports" OR "coping skills" OR "gender" OR "culture" OR "land" OR "animals" OR "water*" OR Abstract: 'métis nation' OR Abstract: 'métis-specific' OR Abstract: 'metis-specific' OR Abstract: 'mixed blood' OR Abstract: 'half-breed' OR Abstract: 'half breed' OR Abstract: 'voyageur'] AND [Abstract: 'income' OR Abstract: 'social status' OR Abstract: 'poverty' OR Abstract: 'housing' OR Abstract: 'racism' OR Abstract: 'colonialism' OR Abstract: 'employment' OR Abstract: 'working conditions' OR Abstract: 'education' OR Abstract: 'literacy' OR Abstract: 'childhood experiences' OR Abstract: 'physical environment' OR Abstract: 'social supports' OR Abstract: 'community supports' OR Abstract: 'coping skills' OR Abstract: 'gender' OR Abstract: 'culture' OR Abstract: 'land' OR Abstract: 'animals' OR Abstract: 'water*'] AND Publication Date: (01/01/1980 TO 12/31/2023)<br><br>limit to (english language and yr ="1980-2023") |
| <b>PubMed</b>                         |                                                                                                                                                                                                                                                                                                                                                                                                                                                                                                                                                                                                                                                                                                                                                                                                                                                                                                                                                                                                                                                                                                                                                                                                                                                                                                                                                                            |
| Search Query 1 AND 2                  | ("metis"[Title/Abstract] OR "Métis*" [Title/Abstract] OR "Métis Nation"[Title/Abstract] OR "Métis-specific"[Title/Abstract] OR "metis-specific"[Title/Abstract] OR "mixed blood"[Title/Abstract] OR "half-breed"[Title/Abstract] OR "half breed"[Title/Abstract] OR "voyageur"[Title/Abstract]) AND ("health*" [Title/Abstract] OR "healthcare*" [Title/Abstract] OR "healthcare"[Title/Abstract] OR "health services"[Title/Abstract] OR "well being"[Title/Abstract] OR "wellbeing*" [Title/Abstract]                                                                                                                                                                                                                                                                                                                                                                                                                                                                                                                                                                                                                                                                                                                                                                                                                                                                    |

|                                  |                                                                                                                                                                                                                                                                                                                                                                                                                                                                                                                                                                                                                                                                                                                                                                                                                                                                                                                                                                                                                               |
|----------------------------------|-------------------------------------------------------------------------------------------------------------------------------------------------------------------------------------------------------------------------------------------------------------------------------------------------------------------------------------------------------------------------------------------------------------------------------------------------------------------------------------------------------------------------------------------------------------------------------------------------------------------------------------------------------------------------------------------------------------------------------------------------------------------------------------------------------------------------------------------------------------------------------------------------------------------------------------------------------------------------------------------------------------------------------|
|                                  | <p>OR "well-being"[Title/Abstract] OR "wellness*"[Title/Abstract] OR "mental health"[Title/Abstract] OR "medic*"[Title/Abstract] OR "illness"[Title/Abstract] OR "disease*"[Title/Abstract] OR "condition"[Title/Abstract] OR "healthy behaviours"[Title/Abstract] OR "community wellbeing"[Title/Abstract] OR "community well-being"[Title/Abstract] OR "community well being"[Title/Abstract] OR "community wellness"[Title/Abstract])</p> <p>Abstract, English, from 1980-2023</p>                                                                                                                                                                                                                                                                                                                                                                                                                                                                                                                                         |
| <p>Search Query 1 AND 3</p>      | <p>("metis"[Title/Abstract] OR "Métis*"[Title/Abstract] OR "Métis Nation"[Title/Abstract] OR "Métis-specific"[Title/Abstract] OR "metis-specific"[Title/Abstract] OR "mixed blood"[Title/Abstract] OR "half-breed"[Title/Abstract] OR "half breed"[Title/Abstract] OR "voyageur"[Title/Abstract]) AND ("Income"[Title/Abstract] OR "social status"[Title/Abstract] OR "poverty"[Title/Abstract] OR "housing"[Title/Abstract] OR "racism"[Title/Abstract] OR "colonialism"[Title/Abstract] OR "employment"[Title/Abstract] OR "working conditions"[Title/Abstract] OR "education"[Title/Abstract] OR "literacy"[Title/Abstract] OR "childhood experiences"[Title/Abstract] OR "physical environment"[Title/Abstract] OR "social supports"[Title/Abstract] OR "community supports"[Title/Abstract] OR "coping skills"[Title/Abstract] OR "gender"[Title/Abstract] OR "culture"[Title/Abstract] OR "land"[Title/Abstract] OR "animals"[Title/Abstract] OR "water*"[Title/Abstract])</p> <p>Abstract, English, from 1980-2023</p> |
| <b>ProQuest</b>                  |                                                                                                                                                                                                                                                                                                                                                                                                                                                                                                                                                                                                                                                                                                                                                                                                                                                                                                                                                                                                                               |
| <p>Search Query 1 AND 2</p>      | <p>((("metis" or "Métis*" or "Métis Nation" or "Métis-specific" or "metis-specific" or "mixed blood" or "half-breed" or "half breed" or "voyageur") and ("health*" or "healthcare*" or "healthcare" or "health services" or "well being" or "wellbeing*" or "well-being" or "wellness*" or "mental health" or "medic*" or "illness" or "disease*" or "condition" or "healthy behaviours" or "community wellbeing" or "community well-being" or "community well being" or "community wellness"))).mp. [mp=title, abstract, heading word, table of contents, key concepts, original title, tests &amp; measures, mesh word]</p> <p>limit to (english language and yr ="1980-2023")</p>                                                                                                                                                                                                                                                                                                                                          |
| <p>Search Query 1 AND 3</p>      | <p>((("metis" or "Métis*" or "Métis Nation" or "Métis-specific" or "metis-specific" or "mixed blood" or "half-breed" or "half breed" or "voyageur") and ( "Income" OR "social status" OR "poverty" OR "housing" OR "racism" OR "colonialism" OR "employment" OR "working conditions" OR "education" OR "literacy" OR "childhood experiences" OR "physical environment" OR "social supports" OR "community supports" OR "coping skills" OR "gender" OR "culture" OR "land" OR "animals" OR "water*" )).mp. [mp=title, abstract, heading word, table of contents, key concepts, original title, tests &amp; measures, mesh word]</p> <p>limit to (english language and yr ="1980-2023")</p>                                                                                                                                                                                                                                                                                                                                     |
| <b>Indigenous Studies Portal</b> |                                                                                                                                                                                                                                                                                                                                                                                                                                                                                                                                                                                                                                                                                                                                                                                                                                                                                                                                                                                                                               |

|                                                         |
|---------------------------------------------------------|
| Métis AND Health                                        |
| <b>Collaborative Indigenous Research Digital Garden</b> |
| Métis                                                   |

**Hand-searching**

|                                         |                                                                                                                                                                                                                                                                                                                                                                                                                                                                                                                                |
|-----------------------------------------|--------------------------------------------------------------------------------------------------------------------------------------------------------------------------------------------------------------------------------------------------------------------------------------------------------------------------------------------------------------------------------------------------------------------------------------------------------------------------------------------------------------------------------|
| <b>Métis Nation of Alberta</b>          | Resources > Publication (filter: health-related reports)                                                                                                                                                                                                                                                                                                                                                                                                                                                                       |
| <b>Métis Nation BC</b>                  | MNBC Work and Programs<br>> Health<br>> Reports<br>> Downloadable Resources<br>> *all reports and research from these pages were downloaded*                                                                                                                                                                                                                                                                                                                                                                                   |
| <b>Manitoba Métis Federation</b>        | Departments/ Affiliates<br>> Health and Wellness<br>> Publications<br>> *all reports and research from this page were downloaded*                                                                                                                                                                                                                                                                                                                                                                                              |
| <b>Métis Nation - Saskatchewan</b>      | Menu> Health                                                                                                                                                                                                                                                                                                                                                                                                                                                                                                                   |
| <b>Métis Nation of Ontario</b>          | Programs and Services<br>> Healing and Wellness<br>> Health Research Initiative and Projects<br>> Current Projects<br>> Chronic Disease Surveillance Program<br>> Press Releases<br>> Initiative Reports<br>> General Reports<br>> Cardiovascular Disease Reports<br>> Diabetes Reports<br>> Cancer Reports<br>> Respiratory Disease Reports<br>> Other Medical Reports<br>> Past Projects<br>>Our Health Counts Project<br>>Youth Identity Project<br>> Indigenous Knowledge Network Initiative<br>>Healthy Messaging Project |
| <b>Métis Settlement Alberta</b>         | Search: "health"                                                                                                                                                                                                                                                                                                                                                                                                                                                                                                               |
| <b>Northwest Territory Métis Nation</b> | Search: "health"                                                                                                                                                                                                                                                                                                                                                                                                                                                                                                               |
| <b>Les Femmes Michif Optemisiwak</b>    | Menu > Resources > Advanced Search                                                                                                                                                                                                                                                                                                                                                                                                                                                                                             |

1  
2  
3  
4  
5  
6  
7  
8  
9  
10  
11  
12  
13  
14  
15  
16  
17  
18  
19  
20  
21  
22  
23  
24  
25  
26  
27  
28  
29  
30  
31  
32  
33  
34  
35  
36  
37  
38  
39  
40  
41  
42  
43  
44  
45  
46  
47  
48  
49  
50  
51  
52  
53  
54  
55  
56  
57  
58  
59  
60

|                   |                                                              |
|-------------------|--------------------------------------------------------------|
|                   | Advanced Search Filters > Types of Resources: "Report"       |
| Statistics Canada | Subjects > Indigenous Health > Health and Well-being > Métis |

**Google Chrome General Grey Literature Search Strategy**

Operating System: Windows  
Search Engine: Google Chrome  
Search: "metis health and wellness"  
Search Total Results: 3,650,000

For peer review only

# BMJ Open

## Protocol for A Scoping Review of the Landscape of Métis Health and Wellness

|                                 |                                                                                                                                                                                                                                                                                                                                                                                                                                                                                                                                                                                                                                                                                                                |
|---------------------------------|----------------------------------------------------------------------------------------------------------------------------------------------------------------------------------------------------------------------------------------------------------------------------------------------------------------------------------------------------------------------------------------------------------------------------------------------------------------------------------------------------------------------------------------------------------------------------------------------------------------------------------------------------------------------------------------------------------------|
| Journal:                        | <i>BMJ Open</i>                                                                                                                                                                                                                                                                                                                                                                                                                                                                                                                                                                                                                                                                                                |
| Manuscript ID                   | bmjopen-2023-077868.R2                                                                                                                                                                                                                                                                                                                                                                                                                                                                                                                                                                                                                                                                                         |
| Article Type:                   | Protocol                                                                                                                                                                                                                                                                                                                                                                                                                                                                                                                                                                                                                                                                                                       |
| Date Submitted by the Author:   | 05-Feb-2024                                                                                                                                                                                                                                                                                                                                                                                                                                                                                                                                                                                                                                                                                                    |
| Complete List of Authors:       | Boutros, Helana Marie; Métis Nation of Ontario; McMaster University, Health, Society and Aging<br>Koprach, Sabastian; Métis Nation of Ontario; University of Toronto - St George Campus, Public Health<br>Simms, Abigail; Métis Nation of Ontario, Public Health<br>Tsui, Noel; Métis Nation of Ontario, Public Health<br>Boyle, Rose-Anne; Métis Nation of Ontario, Public Health<br>Harrison, Jen; Métis Nation of Ontario<br>Riddell, Melissa; Métis Nation of Ontario, Public Health<br>Sanftenberg, Santana; Métis Nation of Ontario; Lakehead University<br>Cripps, Shelley; Métis Nation of Ontario<br>Edwards, Sarah; Métis Nation of Ontario<br>MNO, Métis Nation of Ontario; Métis Nation of Ontario |
| <b>Primary Subject Heading</b>: | Public health                                                                                                                                                                                                                                                                                                                                                                                                                                                                                                                                                                                                                                                                                                  |
| Secondary Subject Heading:      | Qualitative research                                                                                                                                                                                                                                                                                                                                                                                                                                                                                                                                                                                                                                                                                           |
| Keywords:                       | PUBLIC HEALTH, Health Literacy, EPIDEMIOLOGY, Health Services Accessibility, Primary Health Care, Health Education                                                                                                                                                                                                                                                                                                                                                                                                                                                                                                                                                                                             |
|                                 |                                                                                                                                                                                                                                                                                                                                                                                                                                                                                                                                                                                                                                                                                                                |

SCHOLARONE™  
Manuscripts



1  
2  
3 Protocol for A Scoping Review of the Landscape of Métis Health and Wellness  
4

5 **Abbreviated Title:** Scoping Review Protocol on Métis Health  
6  
7  
8

9 Helana Marie Boutros (MPH)<sup>1,3,5\*</sup>, Sabastian Koprach (B.Sc.)<sup>1,2,3</sup>, Abigail J. Simms (MPH)<sup>1,3</sup>, Noel Tsui  
10 (MPH)<sup>1,3</sup>, Rose-Anne Boyle<sup>1</sup>, Jen Harrison<sup>1</sup>, Melissa Riddell<sup>1</sup>, Santana Sanftenberg<sup>1,4</sup>, Shelley Cripps<sup>1</sup>,  
11 Sarah A. Edwards (PhD)<sup>1,2,3</sup> and the Métis Nation of Ontario MNO<sup>1</sup>  
12

13 1 Métis Nation of Ontario, Ottawa, Ontario, Canada

14 2 Dalla Lana School of Public Health, University of Toronto, Ontario, Canada

15 3 ICES, Ontario, Canada

16 4 Lakehead University, Thunder Bay, Ontario, Canada

17 5 Department of Health, Society and Aging, McMaster University, Canada  
18  
19

20  
21 Emails : [boutrosh@mcmaster.ca](mailto:boutrosh@mcmaster.ca) (HMB), [s.koprach@mail.utoronto.ca](mailto:s.koprach@mail.utoronto.ca) (SK), [abigail.simms@ices.on.ca](mailto:abigail.simms@ices.on.ca)  
22 (AJS), [noel.tsui@ices.on.ca](mailto:noel.tsui@ices.on.ca) (NT), [rose-anneb@metisnation.org](mailto:rose-anneb@metisnation.org) (RB), [JenH@metisnation.org](mailto:JenH@metisnation.org)  
23 (JH), [melissar@metisnation.org](mailto:melissar@metisnation.org) (MR), [srsanfite@lakeheadu.ca](mailto:srsanfite@lakeheadu.ca) (SS), [shelleycr@metisnation.org](mailto:shelleycr@metisnation.org) (SC);  
24 [sarah.edwards@ices.on.ca](mailto:sarah.edwards@ices.on.ca) (SAE), [contactus@metisnation.org](mailto:contactus@metisnation.org) (MNO)  
25  
26

27 \*Corresponding Author  
28

29 **ORCID identifiers:**

30 Helana Marie Boutros: 0009-0007-4185-5063

31 Sabastian Koprach: 0009-0009-9243-0393

32 Noel Tsui: 0000-0002-5202-6873

33 Abigail J Simms: 0003-2779-5037  
34  
35  
36  
37  
38  
39  
40  
41  
42  
43  
44  
45  
46  
47  
48  
49  
50  
51  
52  
53  
54  
55  
56  
57  
58  
59  
60

## Protocol for a Scoping Review of the Landscape of Métis Health

### Abstract

**Introduction:** In Canada, Métis people are one of three distinct Indigenous peoples whose rights are recognized and affirmed in Section 35 of the federal *Constitution Act, 1982*. In line with Métis people having a unique culture, history, language and way of life, a distinctions-based approach is critical to understand the current landscape of Métis-specific health. In this paper, we present a scoping review protocol to describe this research landscape in Canada led by the Métis Nation of Ontario (MNO).

**Methods and analysis:** This scoping review protocol is reported in line with the PRISMA-ScR reporting guidelines and follows Arksey and O'Malley's scoping review methodology. We will search electronic databases (Scopus, MEDLINE, Embase, Web of Science, CINAHL, APA PsycINFO, Anthropology Plus, Bibliography of Indigenous Peoples of North America, Canadian Business and Current Affairs, Indigenous Studies Portal, Informit Indigenous Collection, Collaborative Indigenous Garden, PubMed, ProQuest), grey literature sources and reference lists from selected papers. Two reviewers (HMB and SK) will double-blind screen all titles/ abstracts and full-text studies for inclusion. Any health-related study or health report that includes a Métis-specific health, well-being, or Métis social determinant of health outcome will be included. Relevant variables will be extracted following an iterative process whereby the data charting will be reviewed and updated.

**Ethics and dissemination:** Findings from this scoping review will be shared back through the MNO's existing community-based communication channels. Traditional academic dissemination will also be pursued. Research ethics board approval is not required, since data are from peer-reviewed publications or publicly shared health reports and knowledge translation products.

**Key words:** Métis, health, Indigenous health, FNIM, public health, health outcomes, social determinants of health

### Article Summary Section

#### Strengths and Limitations of This Study

- The methods, as well as all other parts of this scoping review, were designed in collaboration with Métis Nation of Ontario (MNO) Leadership and staff to ensure the data collected will be relevant to the vision of Métis health and wellness.
- The search strategy includes fourteen electronic databases, as well as a broad range of grey literature sources, including Métis Nation-related websites to identify health reports and knowledge translation products of relevance to this review.
- Due to the nature of scoping reviews, a critical appraisal of the literature will not be included in our analysis and discussion.

## Background

The Métis are a distinct Indigenous people with a unique history, culture, language, and way of life.[1] The Métis are one of three constitutionally recognized and distinct Indigenous Peoples in what is now Canada, and account for one third of the Indigenous population with a self-identifying population of 624,220.[2] Of the 624,220 who identify as Métis, 179,345 are Métis citizens represented by one of the five governments of the Canada-Métis Nation Accord across the homeland.[2] The Métis Nation is comprised of descendants of people born of mixed relations between First Nation women and European men who formed a distinct culture and established communities throughout Canada in Alberta, Ontario, British Columbia, Manitoba and Saskatchewan.[3-4] Specifically, the Métis Nation of Ontario (MNO) is the provincial governing body representing over 30,000 registered Métis citizens.[1] Currently, the MNO offers a number of programs and services to its citizens through its various branches.[1] In particular, the Healing and Wellness branch aims to support and advocate for the health needs of the Métis community in Ontario.[1]

Although Métis people are recognized as Indigenous people in the Canadian constitution, they are excluded from existing federal Indigenous-specific health policies and programs.[5-6] Meanwhile, historical policies such as residential schools and child welfare, notably the Sixties Scoop, attempted to assimilate Métis people in Canada.[7] Frequent disputes over jurisdiction eliminate Métis people from both mainstream and Indigenous-specific healthcare systems.[6] These discriminatory colonial practices have had a negative impact on health, identity, and way of life for Métis, including their ties to the land, governance and kinship systems.[8-9] These political actions have contributed to a lack of Métis-specific research and accessible and accurate data, resulting in health disparities compared to the non-Indigenous population in Canada.[6,10-11] Due to issues in data collection, pan-Indigenous approaches, which lump First Nations, Inuit, and Métis data together, the Métis story of health is often indistinguishable in these data sets.

Métis-specific health data is limited. The most recent literature review on Métis health only included publications up to 2009 and identified several gaps in Métis-specific health research.[12] Similar conclusions were drawn from a narrative review contextualizing Métis health and well-being and a recently published scoping review. [13-14] Our planned scoping review to describe the current landscape of Métis-specific health research builds on this existing work by expanding the search strategy to include additional search terms and academic databases. We also include grey literature and pan-Indigenous studies that included disaggregated Métis data, which was a noted limitation of the most recent scoping review on Métis health. [14] Additionally, this scoping review puts recommendations in practice as it engaged MNO Leadership, staff, citizens, and Senators throughout the process. [14] Through these conversations, and conversations held between Métis researchers and staff of other Métis governing bodies, more context can be given to the results concerned trends in Métis health and wellness research. The proposed scoping review protocol also expands the data extraction elements from existing research studies. An updated and expanded review of the landscape of Métis health will confirm the growth of Métis-specific research and support research, program, and policy development, which in turn has the potential to support the overall health and wellness of Métis people.

### Scoping Review Objectives

The primary objective of this scoping review is to describe the current landscape of Métis-specific health research in what is now known as Canada. Secondary objectives include identifying the proportion of studies that (a) were Métis-led or incorporated principles of ethical Métis research and (b) incorporated Métis determinants of health.[15] For the purpose of this scoping review, these objectives will be exploratory in nature.

## Methods and Analysis

A scoping review will be used to explore the current landscape of Métis health and wellness research.[16] This approach was chosen as it allowed us to take a broader look at Métis health and wellness as opposed to focusing on select outcomes.[17] Conducting a scoping review, since it is a form of knowledge synthesis, will capture developments in Métis health research across disciplines.[17] This scoping review will be fundamentally informed and supported by the MNO. The research relationship with the MNO is prioritized throughout this work to ensure the scoping review is relevant to the interests of the MNO.[15,18-19] Ultimately, our goal is to capture more recently published Métis health and wellness research which can be used to inform future MNO-led research projects.[20]

## Protocol Design

This scoping review followed Arksey and O'Malley's scoping review methodology.[16] According to this methodology, there are six different stages in developing a scoping review: (1) identifying the research question; (2) identifying relevant studies; (3) selecting studies; (4) charting the data; (5) collating, summarizing, and reporting the results and (6) consulting with relevant stakeholders. In our case, we will be consulting with our relevant stakeholder, the MNO, throughout the scoping review process. The Preferred Reporting Items for Systematic Reviews and Meta-Analysis will be used to report the search results.[21]

### Stage 1: Identifying the Research Question

Through consultation with the MNO and the research team, the primary research question was co-conceived as: "What is the current landscape of Métis-specific health research in Canada?"

### Stage 2: Identifying Relevant Studies - *Search Strategy and Information Sources*

This stage will be iterative and will include reviewing the literature, refining the search strategy, and including further sources of evidence identified in reference lists from selected papers. Title and abstract review will precede the full-text review of the selected studies. The search strategy and inclusion and exclusion criteria have been co-developed and agreed on by the MNO and the research team. This study will be conducted between April 2023 and December 2023.

Identification of studies relevant to this review will be achieved by a structured search in the following electronic databases: Scopus, MEDLINE, Embase, Web of Science, CINAHL, APA PsycINFO, Anthropology Plus, Bibliography of Indigenous Peoples of North America, Canadian Business and Current Affairs, Indigenous Studies Portal, Informit Indigenous Collection, Collaborative Indigenous Garden, PubMed, ProQuest. The search strategy will be based on a systemic combination of keywords and Boolean operators AND/OR applied to each database. Key words for searches are as follows: ("Métis\*" OR "Métis Nation" OR "metis" OR "Métis-specific" OR "metis-specific" OR "mixed blood" OR "half-breed" OR "half breed" OR "voyageur") AND ("health\*" OR "healthcare\*" OR "healthcare" OR "health services" OR "well being" OR "wellbeing\*" OR "well-being" OR "wellness\*" OR "mental health" OR "medic\*" OR "illness" OR "disease\*" OR "condition" OR "healthy behaviours" OR "community wellbeing" OR "community well-being" OR "community well being" OR "community wellness"). The full search strategy across all databases is provided in this protocol's supplementary material. The search will be limited to articles published in the English language studies from 1980 to present date. Search results will be downloaded as ris files and imported into Covidence to store and manage papers.[22]

1  
2  
3  
4  
5  
6 To ensure that relevant information is captured for the landscape of Métis health, a variety of  
7 literature sources (e.g., Indigenous Studies Portal and Collaborative Indigenous Garden), as well as  
8 Google (first 100 hits), will be searched to identify published articles and reports that are relevant to this  
9 scoping review. Furthermore, a hand search will be conducted on all Métis Nation-related websites to  
10 identify health reports and health deliverables of relevance to this review. Forward and backward citation  
11 searches of all included documents will be conducted to identify additional studies that also meet the  
12 scoping review's inclusion criteria.  
13

14  
15 Similar to the academic literature search, the grey literature search terms will be determined by  
16 the MNO and the research team. The search strategy for databases and grey literature will also be  
17 developed by the research team with iterative input from the MNO collaborators.  
18

### 19 **Stage 3: Study Selection**

20  
21 The review process will consist of two levels of screening: (1) a title and abstract review and (2)  
22 full-text review. Two researchers (HMB and SK) will double blind screen the title and abstract of all  
23 imported citations and assess whether to include them, based on the set inclusion and exclusion criteria.  
24 Duplicates will be removed by Covidence prior to starting title/abstract screening and screeners will  
25 manually remove duplicates if appropriate. All studies that were included by both reviewers will undergo  
26 full-text review. In the second step, the two reviewers will independently review the full-texts against the  
27 inclusion and exclusion criteria. At this point, any discordant full-text studies will be reviewed again, in  
28 which both researchers will verbally be discussing their rationale for including or excluding these studies  
29 and resolving discordant votes on Covidence. If full consensus is not obtained regarding study inclusion  
30 and exclusion, a third reviewer (AJS) will resolve any disagreement.  
31

#### 32 *Inclusion criteria:*

- 33 • Published in the English language between 1980 and to present date.
- 34 • Include an identified Métis population (i.e., Can include self-identified, registered Métis,  
35 disaggregated reporting if pan-Indigenous and absence of Métis-specific health outcomes) across  
36 any age group.
- 37 • Examine a health, wellbeing, or Métis social determinant of health outcome.  
38

#### 39 *Exclusion criteria:*

- 40 • Pan-Indigenous (i.e., data is not disaggregated) or non-Métis population
- 41 • Not a health-related study (e.g., language or legal paper)
- 42 • Published in languages other than English due to the limited resources for translation.
- 43 • Published earlier than 1980.  
44

### 45 **Stage 4: Data Collection**

46  
47 Study characteristics, as determined by the MNO and research team, will be extracted and  
48 summarized in a charting table for full-text studies, relevant forward and backward citations of full-text  
49 studies (snowballed studies), as well as hand searched Métis Nation-related health reports and other  
50 deliverables. The team will follow an iterative process (through monthly meetings and email  
51 correspondence) whereby the data charting will be reviewed, refined, and continually updated on an Excel  
52 spreadsheet document. Relevant variables will be extracted, including, but not limited to: author(s), year  
53 of publication, journal of publication, the peer-review article being published open or closed access, year  
54  
55  
56  
57  
58  
59

1  
2  
3 of data collected, aims/ purpose, study population and size, methodology (e.g., quantitative, qualitative, Métis methodologies), observation or intervention study, health context (e.g., primary healthcare setting, community setting, etc.), health outcome(s) studies, Métis-led/collaborative partnership/use of ethical principles of Métis research (e.g., the extent that research is Métis-led as opposed to led by government, for instance), description of Métis identity (e.g. self-identified or citizenship), Métis-authorship (e.g., the observance of one or more Métis authors in the literature) the presence of strength-based versus deficit-based approaches, incorporation of Métis social determinants of health and Métis vision of health (e.g., how literature is defining health, how these determinants are described in the literature and how they resonate across nations, irrespective of the formal document), and gaps and trajectories in the research.

13  
14 With respect to grey literature, study characteristics extracted will include, but may not be  
15 limited to, hit result number, title, and health outcome. Data extraction will be conducted by one  
16 researcher and data will be compiled in Microsoft Excel spreadsheet for coding.

### 17 18 **Stage 5: Data Summary and Synthesis of Results**

19  
20 Since a scoping review aims to map key concepts and clarify conceptual boundaries of a topic or  
21 field, this scoping review will not be critically appraising the studies included.[16-17] Rather, this scoping  
22 review will provide an overview of all included studies.[16-17] Data will be conceptualized and  
23 condensed from data extraction tables for a narrative report of available data on the following themes:  
24 Métis populations studied, if the eligibility criteria was based on self-identification or Métis citizenship, if  
25 studies are Métis-specific or pan-Indigenous, health outcomes studied, region of study, study design, the  
26 extent to which studies were Métis-led or incorporated principles of ethical Métis research and  
27 incorporated Métis determinants of health. Results of full-text, snowballed results, hand-searched health  
28 reports and grey literature will be aggregated together and reported.[16]

### 29 30 31 **Stage 6: Consultation**

32  
33 The MNO has a data-sharing agreement with ICES (formerly the Institute for Clinical Evaluative  
34 Sciences) wherein ICES staff are seconded to the MNO and work exclusively on MNO health and  
35 wellness research at the direction of the MNO. This scoping review was co-conceived within this  
36 partnership. The research team includes MNO staff members, MNO citizens and non-Métis ICES  
37 researchers seconded to support Métis-driven research. To address the landscape of Métis health, the  
38 research team iteratively developed the research question, objectives, and search strategy, and will co-  
39 interpret the results throughout the entire research process; this will ensure that the research is strengths-  
40 based and for the collective benefit of Métis people and communities.

### 41 42 **Ethics and Dissemination**

43  
44 The MNO secretariat approved the study prior to commencement. Research ethics board approval  
45 is not required since data are from peer-reviewed publications or publicly shared reports and health  
46 deliverables. Findings from this scoping review will be shared back through the MNO's existing  
47 communication channels including their website, social media accounts, MNO Voyageur newspaper, and  
48 community gatherings. The research team will work closely with the MNO's communications team to  
49 develop knowledge products targeted to MNO citizens. Results will be shared across governing members  
50 of the Métis Nation and the Métis National Council as well as through existing collaborative health tables  
51 hosted by Métis government, who may choose to share it with their citizens. Traditional academic  
52 dissemination will also be pursued including peer-review publication and conference presentations, in line  
53 with the MNO's desire to contribute to closing the current gap in Métis health research. Findings from  
54 this scoping review will support strategic planning on health research across the Métis Nation.

## Author's Contributions

**Helana Marie Boutros:** wrote and prepared the first draft of the scoping review protocol; reviewed, provided feedback, and approved the scoping review design, approach, search strategy and data extraction tables; read and approved the manuscript.

**Sabastian Koprach:** reviewed, provided feedback, and approved the scoping review design, approach, search strategy and data extraction tables; read and approved the manuscript.

**Abigail J. Simms:** co-developed the idea for the scoping review; reviewed, provided feedback, and approved the scoping review design, approach, search strategy and data extraction tables; read and approved the manuscript.

**Noel Tsui:** co-developed the idea for the scoping review; reviewed, provided feedback, and approved the scoping review design, approach, search strategy and data extraction tables; read and approved the manuscript.

**Rose-Anne Boyle:** co-developed the idea for the scoping review; reviewed, provided feedback, and approved the scoping review design, approach, search strategy and data extraction tables; read and approved the manuscript.

**Jen Harrison:** reviewed, provided feedback, and approved the scoping review design, approach, search strategy and data extraction tables; read and approved the manuscript.

**Melissa Riddell:** reviewed, provided feedback, and approved the scoping review design, approach, search strategy and data extraction tables; read and approved the manuscript.

**Santana Sanftenberg:** reviewed, provided feedback, and approved the scoping review design, approach, search strategy and data extraction tables; read and approved the manuscript.

**Shelley Cripps:** co-developed the idea for the scoping review; reviewed, provided feedback, and approved the scoping review design, approach, search strategy and data extraction tables; read and approved the manuscript.

**Sarah A. Edwards:** co-developed the idea for the scoping review; reviewed, provided feedback, and approved the scoping review design, approach, search strategy and data extraction tables; read and approved the manuscript.

**Métis Nation of Ontario:** co-developed the idea for the scoping review; reviewed, provided feedback, and approved the scoping review design, approach, search strategy and data extraction tables; read and approved the manuscript.

**Positionality:** Shelley Cripps, Sabastian Koprach, Abigail J. Simms, Jen Harrison, Melissa Riddell and Santana Sanftenberg are citizens of the Métis Nation of Ontario, or are in the process of obtaining citizenship, and provided a Métis lens for the scoping review protocol.

**Funding:** This research received no specific grant from any funding agency in the public, commercial or not-for-profit sectors.

**Patient and Public Involvement Statement:** None

**Competing Interests:** None declared

**Provenance and Peer Review:**

**Data Sharing Statement:** No additional data available

## References

1. *Métis Nation of Ontario | About the Métis of Ontario*. (2023). Retrieved September 17, 2021, from <https://www.metisnation.org/about-the-mno/>
2. *Membership in a Métis organization or Settlement: Findings from the 2021 Census of Population*. (2021). Retrieved January 24, 2023, from <https://www12.statcan.gc.ca/census-recensement/2021/as-sa/98-200-X/2021006/98-200-X2021006-eng.cfm>
3. Métis National Council. (2023) *About Us*. <https://www.metisnation.ca/about/about-us>
4. *Métis Nation of Ontario | Registry | Métis of Ontario*. (2023). Retrieved January 24, 2023, from <https://www.metisnation.org/registry/>
5. Desmarais, D. (2017). Spare a Thought for Métis Women Elders: Illness and Poverty in Elderhood. In J. Green (Ed.), *Making Space for Indigenous Feminism* (2nd Editio, pp. 192– 210). Fernwood Publishing.
6. *Métis Nation of Ontario | A Vision for Health*. (2023). Retrieved September 17, 2021, from <https://www.metisnation.ca/uploads/documents/3-1>
7. Allan, B. & Smylie, J. (2015). *First Peoples, second class treatment: The role of racism in the health and well-being of Indigenous peoples in Canada*. Toronto, ON: the Wellesley Institute
8. Fiola, C. (2012). *Re-kindling the sacred fire: Métis ancestry, Anishinaabe spirituality and identity* [Doctoral dissertation, Trent University]. ProQuest Dissertations and Theses.
9. Iseke, J. M. (2010). Importance of Métis ways of knowing in healing communities. *Canadian Journal of Native Education*, 33(1), 83–97, 155
10. Evans, M., C. Anderson, D. Dietrich, C. Bourassa, T. Logan, L.D. Berg, and B. DeVolder. (2012). “Funding and ethics in Métis Community Based Research: The Complication of a Contemporary Context.” *International Journal of Critical Indigenous Studies*. 5(1): 54-66
11. Smylie, J. (2009). The health of Aboriginal peoples. In D. Raphael (Ed.), *Social determinants of health: Canadian perspectives* (pp. 280–301). Canadian Scholars Press.
12. Kumar, M. B., Wesche, S., & McGuire, C. (2012). Trends in Métis-related health research (1980-2009): Identification of research gaps. *Canadian Journal of Public Health*, 103(1), 23–28. <https://doi.org/10.1007/bf03404064>
13. Macdougall, B. (2017). *Land, family and identity: Contextualizing Metis health and well-being*. Prince George, BC: National Collaborating Centre for Aboriginal Health. [Land, Family and Identity: Contextualizing Metis health and well-being \(nccih.ca\)](https://www.nccih.ca/land-family-and-identity-contextualizing-metis-health-and-well-being)
14. Gmitroski, K. L., Hastings, K. G., Legault, G., & Barbic, S. (2023). Métis health in Canada: a scoping review of Métis-specific health literature. *CMAJ open*, 11(5), E884–E893. <https://doi.org/10.9778/cmajo.20230006>
15. *Principles of Ethical Métis Research - ACHH*. achh.ca. (2018). Retrieved March 9, 2023, from [https://achh.ca/wp-content/uploads/2018/07/Guide\\_Ethics\\_NAHOMetisCentre.pdf](https://achh.ca/wp-content/uploads/2018/07/Guide_Ethics_NAHOMetisCentre.pdf)
16. Arksey, H., & O’Malley, L. (2005). Scoping studies: towards a methodological framework. *International Journal of Social Research Methodology*, 8(1), 19–32. <https://doi.org/10.1080/1364557032000119616>
17. Peters, M. D. J., Godfrey, C. M., Khalil, H., McInerney, P., Parker, D., & Soares, C. B. (2015). Guidance for conducting systematic scoping reviews. *International Journal of Evidence-Based Healthcare*, 13(3), 141–146. <https://doi.org/10.1097/xeb.0000000000000050>
18. Bassett, R., & McGibbon, E. (2013). A critical participatory and collaborative method for scoping the literature. *Quality & Quantity*, 47(6), 3249–3259. <https://doi.org/10.1007/s11135-012-9715-2>
19. Kirkness, V. J. and R. Barnhardt (2001). First Nations and Higher Education: The Four R's - Respect, Relevance, Reciprocity, Responsibility. *Knowledge Across Cultures: A Contribution to Dialogue Among Civilizations*. R. Hayoe and J. Pan. Hong Kong, Comparative Education Research Centre, The University of Hong Kong.



- 1
  - 2
  - 3
  - 4
  - 5
  - 6
  - 7
  - 8
  - 9
  - 10
  - 11
  - 12
  - 13
  - 14
  - 15
  - 16
  - 17
  - 18
  - 19
  - 20
  - 21
  - 22
  - 23
  - 24
  - 25
  - 26
  - 27
  - 28
  - 29
  - 30
  - 31
  - 32
  - 33
  - 34
  - 35
  - 36
  - 37
  - 38
  - 39
  - 40
  - 41
  - 42
  - 43
  - 44
  - 45
  - 46
  - 47
  - 48
  - 49
  - 50
  - 51
  - 52
  - 53
  - 54
  - 55
  - 56
  - 57
  - 58
  - 59
  - 60
20. Munn, Z., Peters, M. D., Stern, C., Tufanaru, C., McArthur, A., & Aromataris, E. (2018). Systematic Review or scoping review? guidance for authors when choosing between a systematic or scoping review approach. *BMC Medical Research Methodology*, 18(1). <https://doi.org/10.1186/s12874-018-0611-x>
21. Page, M. J., & Moher, D. (2017). Evaluations of the uptake and impact of the preferred reporting items for systematic reviews and meta-analyses (PRISMA) statement and extensions: A scoping review. *Systematic Reviews*, 6(1). <https://doi.org/10.1186/s13643-017-0663-8>
22. Covidence systematic review software, Veritas Health Innovation, Melbourne, Australia.

## Appendix

### Search Strategy

#### Databases

| Scopus               |                                                                                                                                                                                                                                                                                                                                                                                                                                                                                                                                                                                                                                                                                                                                                                                                                                                       |
|----------------------|-------------------------------------------------------------------------------------------------------------------------------------------------------------------------------------------------------------------------------------------------------------------------------------------------------------------------------------------------------------------------------------------------------------------------------------------------------------------------------------------------------------------------------------------------------------------------------------------------------------------------------------------------------------------------------------------------------------------------------------------------------------------------------------------------------------------------------------------------------|
| Search Query 1 AND 2 | TITLE-ABS-KEY(( "metis" OR "Métis*" OR "Métis Nation" OR "Métis-specific" OR "metis-specific" OR "mixed blood" OR "half-breed" OR "half breed" OR "voyageur") AND ("health*" OR "healthcare*" OR "healthcare" OR "health services" OR "well being" OR "wellbeing*" OR "well-being" OR "wellness*" OR "mental health" OR "medic*" OR "illness" OR "disease*" OR "condition" OR "healthy behaviours" OR "community wellbeing" OR "community well-being" OR "community well being" OR "community wellness")) AND PUBYEAR >1979 AND (LIMIT-TO (LANGUAGE, "English"))                                                                                                                                                                                                                                                                                      |
| Search Query 1 AND 3 | TITLE-ABS-KEY(( "metis" OR "Métis*" OR "Métis Nation" OR "Métis-specific" OR "metis-specific" OR "mixed blood" OR "half-breed" OR "half breed" OR "voyageur") AND ( "Income" OR "social status" OR "poverty" OR "housing" OR "racism" OR "colonialism" OR "employment" OR "working conditions" OR "education" OR "literacy" OR "childhood experiences" OR "physical environment" OR "social supports" OR "community supports" OR "coping skills" OR "gender" OR "culture" OR "land" OR "animals" OR "water*" )) AND PUBYEAR >1979 AND (LIMIT-TO (LANGUAGE, "English"))                                                                                                                                                                                                                                                                                |
| Medline              |                                                                                                                                                                                                                                                                                                                                                                                                                                                                                                                                                                                                                                                                                                                                                                                                                                                       |
| Search Query 1 AND 2 | (( "metis" OR "Métis*" OR "Métis Nation" OR "Métis-specific" OR "metis-specific" OR "mixed blood" OR "half-breed" OR "half breed" OR "voyageur") AND ("health*" OR "healthcare*" OR "healthcare" OR "health services" OR "well being" OR "wellbeing*" OR "well-being" OR "wellness*" OR "mental health" OR "medic*" OR "illness" OR "disease*" OR "condition" OR "healthy behaviours" OR "community wellbeing" OR "community well-being" OR "community well being" OR "community wellness")). mp. [mp=title, book title, abstract, original title, name of substance word, subject heading word, floating sub-heading word, keyword heading, organism supplementary concept word, protocol supplementary concept, rare disease supplementary concept word, unique identifier, synonyms]<br><br>limit to (english language and yr ="1980-2023")        |
| Search Query 1 AND 3 | (( "metis" OR "Métis*" OR "Métis Nation" OR "Métis-specific" OR "metis-specific" OR "mixed blood" OR "half-breed" OR "half breed" OR "voyageur") AND ( "Income" OR "social status" OR "poverty" OR "housing" OR "racism" OR "colonialism" OR "employment" OR "working conditions" OR "education" OR "literacy" OR "childhood experiences" OR "physical environment" OR "social supports" OR "community supports" OR "coping skills" OR "gender" OR "culture" OR "land" OR "animals" OR "water*" )) . mp. [mp=title, book title, abstract, original title, name of substance word, subject heading word, floating sub-heading word, keyword heading, organism supplementary concept word, protocol supplementary concept, rare disease supplementary concept word, unique identifier, synonyms]<br><br>limit to (english language and yr ="1980-2023") |

| Embase               |                                                                                                                                                                                                                                                                                                                                                                                                                                                                                                                                                                                                                                                                                                                                                      |
|----------------------|------------------------------------------------------------------------------------------------------------------------------------------------------------------------------------------------------------------------------------------------------------------------------------------------------------------------------------------------------------------------------------------------------------------------------------------------------------------------------------------------------------------------------------------------------------------------------------------------------------------------------------------------------------------------------------------------------------------------------------------------------|
| Search Query 1 AND 2 | <p>(( "metis" OR "Métis*" OR "Métis Nation" OR "Métis-specific" OR "metis-specific" OR "mixed blood" OR "half-breed" OR "half breed" OR "voyageur") AND ("health*" OR "healthcare*" OR "healthcare" OR "health services" OR "well being" OR "wellbeing*" OR "well-being" OR "wellness*" OR "mental health" OR "medic*" OR "illness" OR "disease*" OR "condition" OR "healthy behaviours" OR "community wellbeing" OR "community well-being" OR "community well being" OR "community wellness")). mp. [mp=title, abstract, heading word, drug trade name, original title, drug manufacturer, device trade name, keyword heading word, floating subheading word, candidate term word]</p> <p>limit to (english language and yr ="1980-2023")</p>       |
| Search Query 1 AND 3 | <p>(( "metis" OR "Métis*" OR "Métis Nation" OR "Métis-specific" OR "metis-specific" OR "mixed blood" OR "half-breed" OR "half breed" OR "voyageur") AND ( "Income" OR "social status" OR "poverty" OR "housing" OR "racism" OR "colonialism" OR "employment" OR "working conditions" OR "education" OR "literacy" OR "childhood experiences" OR "physical environment" OR "social supports" OR "community supports" OR "coping skills" OR "gender" OR "culture" OR "land" OR "animals" OR "water*" )). mp. [mp=title, abstract, heading word, drug trade name, original title, drug manufacturer, device trade name, keyword heading word, floating subheading word, candidate term word]</p> <p>limit to (english language and yr ="1980-2023")</p> |
| Web of Science       |                                                                                                                                                                                                                                                                                                                                                                                                                                                                                                                                                                                                                                                                                                                                                      |
| Search Query 1 AND 2 | <p>( "metis" OR "Métis*" OR "Métis Nation" OR "Métis-specific" OR "metis-specific" OR "mixed blood" OR "half-breed" OR "half breed" OR "voyageur") AND ("health*" OR "healthcare*" OR "healthcare" OR "health services" OR "well being" OR "wellbeing*" OR "well-being" OR "wellness*" OR "mental health" OR "medic*" OR "illness" OR "disease*" OR "condition" OR "healthy behaviours" OR "community wellbeing" OR "community well-being" OR "community well being" OR "community wellness")</p> <p>limit to English; no publication filter (earliest was 1992)</p>                                                                                                                                                                                 |
| Search Query 1 AND 3 | <p>( "metis" OR "Métis*" OR "Métis Nation" OR "Métis-specific" OR "metis-specific" OR "mixed blood" OR "half-breed" OR "half breed" OR "voyageur") AND ( "Income" OR "social status" OR "poverty" OR "housing" OR "racism" OR "colonialism" OR "employment" OR "working conditions" OR "education" OR "literacy" OR "childhood experiences" OR "physical environment" OR "social supports" OR "community supports" OR "coping skills" OR "gender" OR "culture" OR "land" OR "animals" OR "water*" )</p> <p>limit to English; no publication filter (earliest was 1991)</p>                                                                                                                                                                           |
| CINAHL               |                                                                                                                                                                                                                                                                                                                                                                                                                                                                                                                                                                                                                                                                                                                                                      |
| Search Query 1 AND 2 | <p>AB ( "metis" OR "Métis*" OR "Métis Nation" OR "Métis-specific" OR "metis-specific" OR "mixed blood" OR "half-breed" OR "half breed" OR "voyageur") AND AB ("health*" OR "healthcare*" OR "healthcare" OR "health services" OR "well being" OR "wellbeing*" OR "well-being" OR "wellness*" OR "mental health" OR "medic*" OR "illness" OR "disease*"</p>                                                                                                                                                                                                                                                                                                                                                                                           |

|                          |                                                                                                                                                                                                                                                                                                                                                                                                                                                                                                                                                                                                                                                                                           |
|--------------------------|-------------------------------------------------------------------------------------------------------------------------------------------------------------------------------------------------------------------------------------------------------------------------------------------------------------------------------------------------------------------------------------------------------------------------------------------------------------------------------------------------------------------------------------------------------------------------------------------------------------------------------------------------------------------------------------------|
|                          | <p>OR "condition" OR "healthy behaviours" OR "community wellbeing" OR "community well-being" OR "community well being" OR "community wellness")</p> <p>Abstract Available, Published Date: 1980, English language<br/>Boolean/ Phrase</p>                                                                                                                                                                                                                                                                                                                                                                                                                                                 |
| Search Query 1 AND 3     | <p>AB ( "metis" OR "Métis*" OR "Métis Nation" OR "Métis-specific" OR "metis-specific" OR "mixed blood" OR "half-breed" OR "half breed" OR "voyageur") AND AB ( "Income" OR "social status" OR "poverty" OR "housing" OR "racism" OR "colonialism" OR "employment" OR "working conditions" OR "education" OR "literacy" OR "childhood experiences" OR "physical environment" OR "social supports" OR "community supports" OR "coping skills" OR "gender" OR "culture" OR "land" OR "animals" OR "water*" )</p> <p>Abstract Available, Published Date: 1980, English language<br/>Boolean/ Phrase</p>                                                                                       |
| <b>APA Psych Info</b>    |                                                                                                                                                                                                                                                                                                                                                                                                                                                                                                                                                                                                                                                                                           |
| Search Query 1 AND 2     | <p>(( "metis" or "Métis*" or "Métis Nation" or "Métis-specific" or "metis-specific" or "mixed blood" or "half-breed" or "half breed" or "voyageur") and ("health*" or "healthcare*" or "healthcare" or "health services" or "well being" or "wellbeing*" or "well-being" or "wellness*" or "mental health" or "medic*" or "illness" or "disease*" or "condition" or "healthy behaviours" or "community wellbeing" or "community well-being" or "community well being" or "community wellness")).mp. [mp=title, abstract, heading word, table of contents, key concepts, original title, tests &amp; measures, mesh word]</p> <p>limit to (english language and yr ="1980-2023")</p>       |
| Search Query 1 AND 3     | <p>(( "metis" or "Métis*" or "Métis Nation" or "Métis-specific" or "metis-specific" or "mixed blood" or "half-breed" or "half breed" or "voyageur") and ( "Income" OR "social status" OR "poverty" OR "housing" OR "racism" OR "colonialism" OR "employment" OR "working conditions" OR "education" OR "literacy" OR "childhood experiences" OR "physical environment" OR "social supports" OR "community supports" OR "coping skills" OR "gender" OR "culture" OR "land" OR "animals" OR "water*" )).mp. [mp=title, abstract, heading word, table of contents, key concepts, original title, tests &amp; measures, mesh word]</p> <p>limit to (english language and yr ="1980-2023")</p> |
| <b>Anthropology Plus</b> |                                                                                                                                                                                                                                                                                                                                                                                                                                                                                                                                                                                                                                                                                           |
| Search Query 1 AND 2     | <p>TX ( "metis" OR "Métis*" OR "Métis Nation" OR "Métis-specific" OR "metis-specific" OR "mixed blood" OR "half-breed" OR "half breed" OR "voyageur") AND TX ("health*" OR "healthcare*" OR "healthcare" OR "health services" OR "well being" OR "wellbeing*" OR "well-being" OR "wellness*" OR "mental health" OR "medic*" OR "illness" OR "disease*" OR "condition" OR "healthy behaviours" OR "community wellbeing" OR "community well-being" OR "community well being" OR "community wellness")</p> <p>limit to (english language and yr ="1980-2023")<br/>Boolean/ Phrase</p>                                                                                                        |

|                                              |                                                                                                                                                                                                                                                                                                                                                                                                                                                                                                                                                                                  |
|----------------------------------------------|----------------------------------------------------------------------------------------------------------------------------------------------------------------------------------------------------------------------------------------------------------------------------------------------------------------------------------------------------------------------------------------------------------------------------------------------------------------------------------------------------------------------------------------------------------------------------------|
| Search Query 1 AND 3                         | TX ( "metis" OR "Métis*" OR "Métis Nation" OR "Métis-specific" OR "metis-specific" OR "mixed blood" OR "half-breed" OR "half breed" OR "voyageur") AND TX ( "Income" OR "social status" OR "poverty" OR "housing" OR "racism" OR "colonialism" OR "employment" OR "working conditions" OR "education" OR "literacy" OR "childhood experiences" OR "physical environment" OR "social supports" OR "community supports" OR "coping skills" OR "gender" OR "culture" OR "land" OR "animals" OR "water*" )<br><br>limit to (english language and yr ="1980-2023")<br>Boolean/ Phrase |
| <b>Bibliography of Indigenous Peoples</b>    |                                                                                                                                                                                                                                                                                                                                                                                                                                                                                                                                                                                  |
| Search Query 1 AND 2                         | AB ( "metis" OR "Métis*" OR "Métis Nation" OR "Métis-specific" OR "metis-specific" OR "mixed blood" OR "half-breed" OR "half breed" OR "voyageur") AND AB ( "health*" OR "healthcare*" OR "healthcare" OR "health services" OR "well being" OR "wellbeing*" OR "well-being" OR "wellness*" OR "mental health" OR "medic*" OR "illness" OR "disease*" OR "condition" OR "healthy behaviours" OR "community wellbeing" OR "community well-being" OR "community well being" OR "community wellness")<br><br>limit to (english language and yr ="1980-2023")<br>Boolean/ Phrase      |
| Search Query 1 AND 3                         | AB ( "metis" OR "Métis*" OR "Métis Nation" OR "Métis-specific" OR "metis-specific" OR "mixed blood" OR "half-breed" OR "half breed" OR "voyageur") AND AB ( "Income" OR "social status" OR "poverty" OR "housing" OR "racism" OR "colonialism" OR "employment" OR "working conditions" OR "education" OR "literacy" OR "childhood experiences" OR "physical environment" OR "social supports" OR "community supports" OR "coping skills" OR "gender" OR "culture" OR "land" OR "animals" OR "water*" )<br><br>limit to (english language and yr ="1980-2023")<br>Boolean/ Phrase |
| <b>Canadian Business and Current Affairs</b> |                                                                                                                                                                                                                                                                                                                                                                                                                                                                                                                                                                                  |
| Search Query 1 AND 2                         | summary ( "metis" OR "Métis*" OR "Métis Nation" OR "Métis-specific" OR "metis-specific" OR "mixed blood" OR "half-breed" OR "half breed" OR "voyageur") AND summary ( "health*" OR "healthcare*" OR "healthcare" OR "health services" OR "well being" OR "wellbeing*" OR "well-being" OR "wellness*" OR "mental health" OR "medic*" OR "illness" OR "disease*" OR "condition" OR "healthy behaviours" OR "community wellbeing" OR "community well-being" OR "community well being" OR "community wellness")<br><br>limit to (english language and yr ="1980-2023")               |
| Search Query 1 AND 3                         | summary ( "metis" OR "Métis*" OR "Métis Nation" OR "Métis-specific" OR "metis-specific" OR "mixed blood" OR "half-breed" OR "half breed" OR "voyageur") AND summary ( "Income" OR "social status" OR "poverty" OR "housing" OR "racism" OR "colonialism" OR "employment" OR "working conditions" OR "education" OR "literacy" OR "childhood experiences" OR "physical environment" OR "social supports" OR "community supports" OR "coping skills" OR "gender" OR "culture" OR "land" OR "animals" OR "water*" )                                                                 |

|                                       |                                                                                                                                                                                                                                                                                                                                                                                                                                                                                                                                                                                                                                                                                                                                                                                                                                                                                                                                                                                                                                                                                                                                                                                                                                                                                                                                                                            |
|---------------------------------------|----------------------------------------------------------------------------------------------------------------------------------------------------------------------------------------------------------------------------------------------------------------------------------------------------------------------------------------------------------------------------------------------------------------------------------------------------------------------------------------------------------------------------------------------------------------------------------------------------------------------------------------------------------------------------------------------------------------------------------------------------------------------------------------------------------------------------------------------------------------------------------------------------------------------------------------------------------------------------------------------------------------------------------------------------------------------------------------------------------------------------------------------------------------------------------------------------------------------------------------------------------------------------------------------------------------------------------------------------------------------------|
|                                       | limit to (english language and yr ="1980-2023")                                                                                                                                                                                                                                                                                                                                                                                                                                                                                                                                                                                                                                                                                                                                                                                                                                                                                                                                                                                                                                                                                                                                                                                                                                                                                                                            |
| <b>Informit Indigenous Collection</b> |                                                                                                                                                                                                                                                                                                                                                                                                                                                                                                                                                                                                                                                                                                                                                                                                                                                                                                                                                                                                                                                                                                                                                                                                                                                                                                                                                                            |
| Search Query 1 AND 2                  | [Abstract:"metis" OR "Métis*" OR "Métis Nation" OR "Métis-specific" OR "metis-specific" OR "mixed blood" OR "half-breed" OR "half breed" OR "voyageur" OR Abstract:"health*" OR "healthcare*" OR "healthcare" OR "health services" OR "well being" OR "wellbeing*" OR "well-being" OR "wellness*" OR "mental health" OR "medic*" OR "illness" OR "disease*" OR "condition" OR "healthy behaviours" OR "community wellbeing" OR "community well-being" OR "community well being" OR "community wellness" OR Abstract: 'métis nation' OR Abstract: 'métis-specific' OR Abstract: 'metis-specific' OR Abstract: 'mixed blood' OR Abstract: 'half-breed' OR Abstract: 'half breed' OR Abstract: 'voyageur'] AND [Abstract: 'health*' OR Abstract: 'healthcare*' OR Abstract: 'healthcare' OR Abstract: 'health services' OR Abstract: 'well being' OR Abstract: 'wellbeing*' OR Abstract: 'well-being' OR Abstract: 'wellness*' OR Abstract: 'mental health' OR Abstract: 'medic*' OR Abstract: 'illness' OR Abstract: 'disease*' OR Abstract: 'condition' OR Abstract: 'healthy behaviours' OR Abstract: 'community wellbeing' OR Abstract: 'community well-being' OR Abstract: 'community well being' OR Abstract: 'community wellness'] AND Publication Date: (01/01/1980 TO 12/31/2023)<br><br>limit to (english language and yr ="1980-2023")                             |
| Search Query 1 AND 3                  | [Abstract:"metis" OR "Métis*" OR "Métis Nation" OR "Métis-specific" OR "metis-specific" OR "mixed blood" OR "half-breed" OR "half breed" OR "voyageur" OR Abstract:"Income" OR "social status" OR "poverty" OR "housing" OR "racism" OR "colonialism" OR "employment" OR "working conditions" OR "education" OR "literacy" OR "childhood experiences" OR "physical environment" OR "social supports" OR "community supports" OR "coping skills" OR "gender" OR "culture" OR "land" OR "animals" OR "water*" OR Abstract: 'métis nation' OR Abstract: 'métis-specific' OR Abstract: 'metis-specific' OR Abstract: 'mixed blood' OR Abstract: 'half-breed' OR Abstract: 'half breed' OR Abstract: 'voyageur'] AND [Abstract: 'income' OR Abstract: 'social status' OR Abstract: 'poverty' OR Abstract: 'housing' OR Abstract: 'racism' OR Abstract: 'colonialism' OR Abstract: 'employment' OR Abstract: 'working conditions' OR Abstract: 'education' OR Abstract: 'literacy' OR Abstract: 'childhood experiences' OR Abstract: 'physical environment' OR Abstract: 'social supports' OR Abstract: 'community supports' OR Abstract: 'coping skills' OR Abstract: 'gender' OR Abstract: 'culture' OR Abstract: 'land' OR Abstract: 'animals' OR Abstract: 'water*'] AND Publication Date: (01/01/1980 TO 12/31/2023)<br><br>limit to (english language and yr ="1980-2023") |
| <b>PubMed</b>                         |                                                                                                                                                                                                                                                                                                                                                                                                                                                                                                                                                                                                                                                                                                                                                                                                                                                                                                                                                                                                                                                                                                                                                                                                                                                                                                                                                                            |
| Search Query 1 AND 2                  | ("metis"[Title/Abstract] OR "Métis*" [Title/Abstract] OR "Métis Nation"[Title/Abstract] OR "Métis-specific"[Title/Abstract] OR "metis-specific"[Title/Abstract] OR "mixed blood"[Title/Abstract] OR "half-breed"[Title/Abstract] OR "half breed"[Title/Abstract] OR "voyageur"[Title/Abstract]) AND ("health*" [Title/Abstract] OR "healthcare*" [Title/Abstract] OR "healthcare"[Title/Abstract] OR "health services"[Title/Abstract] OR "well being"[Title/Abstract] OR "wellbeing*" [Title/Abstract]                                                                                                                                                                                                                                                                                                                                                                                                                                                                                                                                                                                                                                                                                                                                                                                                                                                                    |

|                                  |                                                                                                                                                                                                                                                                                                                                                                                                                                                                                                                                                                                                                                                                                                                                                                                                                                                                                                                                                                                                                               |
|----------------------------------|-------------------------------------------------------------------------------------------------------------------------------------------------------------------------------------------------------------------------------------------------------------------------------------------------------------------------------------------------------------------------------------------------------------------------------------------------------------------------------------------------------------------------------------------------------------------------------------------------------------------------------------------------------------------------------------------------------------------------------------------------------------------------------------------------------------------------------------------------------------------------------------------------------------------------------------------------------------------------------------------------------------------------------|
|                                  | <p>OR "well-being"[Title/Abstract] OR "wellness*"[Title/Abstract] OR "mental health"[Title/Abstract] OR "medic*"[Title/Abstract] OR "illness"[Title/Abstract] OR "disease*"[Title/Abstract] OR "condition"[Title/Abstract] OR "healthy behaviours"[Title/Abstract] OR "community wellbeing"[Title/Abstract] OR "community well-being"[Title/Abstract] OR "community well being"[Title/Abstract] OR "community wellness"[Title/Abstract])</p> <p>Abstract, English, from 1980-2023</p>                                                                                                                                                                                                                                                                                                                                                                                                                                                                                                                                         |
| <p>Search Query 1 AND 3</p>      | <p>("metis"[Title/Abstract] OR "Métis*"[Title/Abstract] OR "Métis Nation"[Title/Abstract] OR "Métis-specific"[Title/Abstract] OR "metis-specific"[Title/Abstract] OR "mixed blood"[Title/Abstract] OR "half-breed"[Title/Abstract] OR "half breed"[Title/Abstract] OR "voyageur"[Title/Abstract]) AND ("Income"[Title/Abstract] OR "social status"[Title/Abstract] OR "poverty"[Title/Abstract] OR "housing"[Title/Abstract] OR "racism"[Title/Abstract] OR "colonialism"[Title/Abstract] OR "employment"[Title/Abstract] OR "working conditions"[Title/Abstract] OR "education"[Title/Abstract] OR "literacy"[Title/Abstract] OR "childhood experiences"[Title/Abstract] OR "physical environment"[Title/Abstract] OR "social supports"[Title/Abstract] OR "community supports"[Title/Abstract] OR "coping skills"[Title/Abstract] OR "gender"[Title/Abstract] OR "culture"[Title/Abstract] OR "land"[Title/Abstract] OR "animals"[Title/Abstract] OR "water*"[Title/Abstract])</p> <p>Abstract, English, from 1980-2023</p> |
| <b>ProQuest</b>                  |                                                                                                                                                                                                                                                                                                                                                                                                                                                                                                                                                                                                                                                                                                                                                                                                                                                                                                                                                                                                                               |
| <p>Search Query 1 AND 2</p>      | <p>((("metis" or "Métis*" or "Métis Nation" or "Métis-specific" or "metis-specific" or "mixed blood" or "half-breed" or "half breed" or "voyageur") and ("health*" or "healthcare*" or "healthcare" or "health services" or "well being" or "wellbeing*" or "well-being" or "wellness*" or "mental health" or "medic*" or "illness" or "disease*" or "condition" or "healthy behaviours" or "community wellbeing" or "community well-being" or "community well being" or "community wellness"))).mp. [mp=title, abstract, heading word, table of contents, key concepts, original title, tests &amp; measures, mesh word]</p> <p>limit to (english language and yr ="1980-2023")</p>                                                                                                                                                                                                                                                                                                                                          |
| <p>Search Query 1 AND 3</p>      | <p>((("metis" or "Métis*" or "Métis Nation" or "Métis-specific" or "metis-specific" or "mixed blood" or "half-breed" or "half breed" or "voyageur") and ( "Income" OR "social status" OR "poverty" OR "housing" OR "racism" OR "colonialism" OR "employment" OR "working conditions" OR "education" OR "literacy" OR "childhood experiences" OR "physical environment" OR "social supports" OR "community supports" OR "coping skills" OR "gender" OR "culture" OR "land" OR "animals" OR "water*" )).mp. [mp=title, abstract, heading word, table of contents, key concepts, original title, tests &amp; measures, mesh word]</p> <p>limit to (english language and yr ="1980-2023")</p>                                                                                                                                                                                                                                                                                                                                     |
| <b>Indigenous Studies Portal</b> |                                                                                                                                                                                                                                                                                                                                                                                                                                                                                                                                                                                                                                                                                                                                                                                                                                                                                                                                                                                                                               |

|                                                         |
|---------------------------------------------------------|
| Métis AND Health                                        |
| <b>Collaborative Indigenous Research Digital Garden</b> |
| Métis                                                   |

**Hand-searching**

|                                         |                                                                                                                                                                                                                                                                                                                                                                                                                                                                                                                                |
|-----------------------------------------|--------------------------------------------------------------------------------------------------------------------------------------------------------------------------------------------------------------------------------------------------------------------------------------------------------------------------------------------------------------------------------------------------------------------------------------------------------------------------------------------------------------------------------|
| <b>Métis Nation of Alberta</b>          | Resources > Publication (filter: health-related reports)                                                                                                                                                                                                                                                                                                                                                                                                                                                                       |
| <b>Métis Nation BC</b>                  | MNBC Work and Programs<br>> Health<br>> Reports<br>> Downloadable Resources<br>> *all reports and research from these pages were downloaded*                                                                                                                                                                                                                                                                                                                                                                                   |
| <b>Manitoba Métis Federation</b>        | Departments/ Affiliates<br>> Health and Wellness<br>> Publications<br>> *all reports and research from this page were downloaded*                                                                                                                                                                                                                                                                                                                                                                                              |
| <b>Métis Nation - Saskatchewan</b>      | Menu> Health                                                                                                                                                                                                                                                                                                                                                                                                                                                                                                                   |
| <b>Métis Nation of Ontario</b>          | Programs and Services<br>> Healing and Wellness<br>> Health Research Initiative and Projects<br>> Current Projects<br>> Chronic Disease Surveillance Program<br>> Press Releases<br>> Initiative Reports<br>> General Reports<br>> Cardiovascular Disease Reports<br>> Diabetes Reports<br>> Cancer Reports<br>> Respiratory Disease Reports<br>> Other Medical Reports<br>> Past Projects<br>>Our Health Counts Project<br>>Youth Identity Project<br>> Indigenous Knowledge Network Initiative<br>>Healthy Messaging Project |
| <b>Métis Settlement Alberta</b>         | Search: "health"                                                                                                                                                                                                                                                                                                                                                                                                                                                                                                               |
| <b>Northwest Territory Métis Nation</b> | Search: "health"                                                                                                                                                                                                                                                                                                                                                                                                                                                                                                               |
| <b>Les Femmes Michif Optemisiwak</b>    | Menu > Resources > Advanced Search                                                                                                                                                                                                                                                                                                                                                                                                                                                                                             |



1  
2  
3  
4  
5  
6  
7  
8  
9  
10  
11  
12  
13  
14  
15  
16  
17  
18  
19  
20  
21  
22  
23  
24  
25  
26  
27  
28  
29  
30  
31  
32  
33  
34  
35  
36  
37  
38  
39  
40  
41  
42  
43  
44  
45  
46  
47  
48  
49  
50  
51  
52  
53  
54  
55  
56  
57  
58  
59  
60

|                   |                                                              |
|-------------------|--------------------------------------------------------------|
|                   | Advanced Search Filters > Types of Resources: "Report"       |
| Statistics Canada | Subjects > Indigenous Health > Health and Well-being > Métis |

**Google Chrome General Grey Literature Search Strategy**

Operating System: Windows  
Search Engine: Google Chrome  
Search: "metis health and wellness"  
Search Total Results: 3,650,000

For peer review only
