# Supplementary material for: Landscape of Métis health and wellness: protocol for a scoping review
Source: PubMed Central journal article supplement — BMJ Open. 2024 Mar 8;14(3):e077868. doi: 10.1136/bmjopen-2023-077868 (PMC10928757; doi:10.1136/bmjopen-2023-077868), 2024-03-08
Supplement: bmjopen-2023-077868supp001.pdf [file bmjopen-2023-077868supp001.pdf]

## Appendix

### Search Strategy

#### Databases

| Scopus               |                                                                                                                                                                                                                                                                                                                                                                                                                                                                                                                                                                                                                                                                                                                                                                                                                                                       |
|----------------------|-------------------------------------------------------------------------------------------------------------------------------------------------------------------------------------------------------------------------------------------------------------------------------------------------------------------------------------------------------------------------------------------------------------------------------------------------------------------------------------------------------------------------------------------------------------------------------------------------------------------------------------------------------------------------------------------------------------------------------------------------------------------------------------------------------------------------------------------------------|
| Search Query 1 AND 2 | TITLE-ABS-KEY(( "metis" OR "Métis*" OR "Métis Nation" OR "Métis-specific" OR "metis-specific" OR "mixed blood" OR "half-breed" OR "half breed" OR "voyageur") AND ("health*" OR "healthcare*" OR "healthcare" OR "health services" OR "well being" OR "wellbeing*" OR "well-being" OR "wellness*" OR "mental health" OR "medic*" OR "illness" OR "disease*" OR "condition" OR "healthy behaviours" OR "community wellbeing" OR "community well-being" OR "community well being" OR "community wellness")) AND PUBYEAR >1979 AND (LIMIT-TO (LANGUAGE, "English"))                                                                                                                                                                                                                                                                                      |
| Search Query 1 AND 3 | TITLE-ABS-KEY(( "metis" OR "Métis*" OR "Métis Nation" OR "Métis-specific" OR "metis-specific" OR "mixed blood" OR "half-breed" OR "half breed" OR "voyageur") AND ( "Income" OR "social status" OR "poverty" OR "housing" OR "racism" OR "colonialism" OR "employment" OR "working conditions" OR "education" OR "literacy" OR "childhood experiences" OR "physical environment" OR "social supports" OR "community supports" OR "coping skills" OR "gender" OR "culture" OR "land" OR "animals" OR "water*" )) AND PUBYEAR >1979 AND (LIMIT-TO (LANGUAGE, "English"))                                                                                                                                                                                                                                                                                |
| Medline              |                                                                                                                                                                                                                                                                                                                                                                                                                                                                                                                                                                                                                                                                                                                                                                                                                                                       |
| Search Query 1 AND 2 | (( "metis" OR "Métis*" OR "Métis Nation" OR "Métis-specific" OR "metis-specific" OR "mixed blood" OR "half-breed" OR "half breed" OR "voyageur") AND ("health*" OR "healthcare*" OR "healthcare" OR "health services" OR "well being" OR "wellbeing*" OR "well-being" OR "wellness*" OR "mental health" OR "medic*" OR "illness" OR "disease*" OR "condition" OR "healthy behaviours" OR "community wellbeing" OR "community well-being" OR "community well being" OR "community wellness")). mp. [mp=title, book title, abstract, original title, name of substance word, subject heading word, floating sub-heading word, keyword heading, organism supplementary concept word, protocol supplementary concept, rare disease supplementary concept word, unique identifier, synonyms]<br><br>limit to (english language and yr ="1980-2023")        |
| Search Query 1 AND 3 | (( "metis" OR "Métis*" OR "Métis Nation" OR "Métis-specific" OR "metis-specific" OR "mixed blood" OR "half-breed" OR "half breed" OR "voyageur") AND ( "Income" OR "social status" OR "poverty" OR "housing" OR "racism" OR "colonialism" OR "employment" OR "working conditions" OR "education" OR "literacy" OR "childhood experiences" OR "physical environment" OR "social supports" OR "community supports" OR "coping skills" OR "gender" OR "culture" OR "land" OR "animals" OR "water*" )) . mp. [mp=title, book title, abstract, original title, name of substance word, subject heading word, floating sub-heading word, keyword heading, organism supplementary concept word, protocol supplementary concept, rare disease supplementary concept word, unique identifier, synonyms]<br><br>limit to (english language and yr ="1980-2023") |

| Embase               |                                                                                                                                                                                                                                                                                                                                                                                                                                                                                                                                                                                                                                                                                                                                               |
|----------------------|-----------------------------------------------------------------------------------------------------------------------------------------------------------------------------------------------------------------------------------------------------------------------------------------------------------------------------------------------------------------------------------------------------------------------------------------------------------------------------------------------------------------------------------------------------------------------------------------------------------------------------------------------------------------------------------------------------------------------------------------------|
| Search Query 1 AND 2 | (( "metis" OR "Métis*" OR "Métis Nation" OR "Métis-specific" OR "metis-specific" OR "mixed blood" OR "half-breed" OR "half breed" OR "voyageur") AND ("health*" OR "healthcare*" OR "healthcare" OR "health services" OR "well being" OR "wellbeing*" OR "well-being" OR "wellness*" OR "mental health" OR "medic*" OR "illness" OR "disease*" OR "condition" OR "healthy behaviours" OR "community wellbeing" OR "community well-being" OR "community well being" OR "community wellness")). mp. [mp=title, abstract, heading word, drug trade name, original title, drug manufacturer, device trade name, keyword heading word, floating subheading word, candidate term word]<br><br>limit to (english language and yr ="1980-2023")       |
| Search Query 1 AND 3 | (( "metis" OR "Métis*" OR "Métis Nation" OR "Métis-specific" OR "metis-specific" OR "mixed blood" OR "half-breed" OR "half breed" OR "voyageur") AND ( "Income" OR "social status" OR "poverty" OR "housing" OR "racism" OR "colonialism" OR "employment" OR "working conditions" OR "education" OR "literacy" OR "childhood experiences" OR "physical environment" OR "social supports" OR "community supports" OR "coping skills" OR "gender" OR "culture" OR "land" OR "animals" OR "water*" )). mp. [mp=title, abstract, heading word, drug trade name, original title, drug manufacturer, device trade name, keyword heading word, floating subheading word, candidate term word]<br><br>limit to (english language and yr ="1980-2023") |
| Web of Science       |                                                                                                                                                                                                                                                                                                                                                                                                                                                                                                                                                                                                                                                                                                                                               |
| Search Query 1 AND 2 | ( "metis" OR "Métis*" OR "Métis Nation" OR "Métis-specific" OR "metis-specific" OR "mixed blood" OR "half-breed" OR "half breed" OR "voyageur") AND ("health*" OR "healthcare*" OR "healthcare" OR "health services" OR "well being" OR "wellbeing*" OR "well-being" OR "wellness*" OR "mental health" OR "medic*" OR "illness" OR "disease*" OR "condition" OR "healthy behaviours" OR "community wellbeing" OR "community well-being" OR "community well being" OR "community wellness")<br><br>limit to English; no publication filter (earliest was 1992)                                                                                                                                                                                 |
| Search Query 1 AND 3 | ( "metis" OR "Métis*" OR "Métis Nation" OR "Métis-specific" OR "metis-specific" OR "mixed blood" OR "half-breed" OR "half breed" OR "voyageur") AND ( "Income" OR "social status" OR "poverty" OR "housing" OR "racism" OR "colonialism" OR "employment" OR "working conditions" OR "education" OR "literacy" OR "childhood experiences" OR "physical environment" OR "social supports" OR "community supports" OR "coping skills" OR "gender" OR "culture" OR "land" OR "animals" OR "water*" )<br><br>limit to English; no publication filter (earliest was 1991)                                                                                                                                                                           |
| CINAHL               |                                                                                                                                                                                                                                                                                                                                                                                                                                                                                                                                                                                                                                                                                                                                               |
| Search Query 1 AND 2 | AB ( "metis" OR "Métis*" OR "Métis Nation" OR "Métis-specific" OR "metis-specific" OR "mixed blood" OR "half-breed" OR "half breed" OR "voyageur") AND AB ("health*" OR "healthcare*" OR "healthcare" OR "health services" OR "well being" OR "wellbeing*" OR "well-being" OR "wellness*" OR "mental health" OR "medic*" OR "illness" OR "disease*"                                                                                                                                                                                                                                                                                                                                                                                           |

|                          |                                                                                                                                                                                                                                                                                                                                                                                                                                                                                                                                                                                                                                                                                            |
|--------------------------|--------------------------------------------------------------------------------------------------------------------------------------------------------------------------------------------------------------------------------------------------------------------------------------------------------------------------------------------------------------------------------------------------------------------------------------------------------------------------------------------------------------------------------------------------------------------------------------------------------------------------------------------------------------------------------------------|
|                          | <p>OR "condition" OR "healthy behaviours" OR "community wellbeing" OR "community well-being" OR "community well being" OR "community wellness")</p> <p>Abstract Available, Published Date: 1980, English language<br/>Boolean/ Phrase</p>                                                                                                                                                                                                                                                                                                                                                                                                                                                  |
| Search Query 1 AND 3     | <p>AB ( "metis" OR "Métis*" OR "Métis Nation" OR "Métis-specific" OR "metis-specific" OR "mixed blood" OR "half-breed" OR "half breed" OR "voyageur") AND AB ( "Income" OR "social status" OR "poverty" OR "housing" OR "racism" OR "colonialism" OR "employment" OR "working conditions" OR "education" OR "literacy" OR "childhood experiences" OR "physical environment" OR "social supports" OR "community supports" OR "coping skills" OR "gender" OR "culture" OR "land" OR "animals" OR "water*" )</p> <p>Abstract Available, Published Date: 1980, English language<br/>Boolean/ Phrase</p>                                                                                        |
| <b>APA Psych Info</b>    |                                                                                                                                                                                                                                                                                                                                                                                                                                                                                                                                                                                                                                                                                            |
| Search Query 1 AND 2     | <p>(( "metis" or "Métis*" or "Métis Nation" or "Métis-specific" or "metis-specific" or "mixed blood" or "half-breed" or "half breed" or "voyageur") and ("health*" or "healthcare*" or "healthcare" or "health services" or "well being" or "wellbeing*" or "well-being" or "wellness*" or "mental health" or "medic*" or "illness" or "disease*" or "condition" or "healthy behaviours" or "community wellbeing" or "community well-being" or "community well being" or "community wellness")).mp. [mp=title, abstract, heading word, table of contents, key concepts, original title, tests &amp; measures, mesh word]</p> <p>limit to (english language and yr ="1980-2023")</p>        |
| Search Query 1 AND 3     | <p>(( "metis" or "Métis*" or "Métis Nation" or "Métis-specific" or "metis-specific" or "mixed blood" or "half-breed" or "half breed" or "voyageur") and ( "Income" OR "social status" OR "poverty" OR "housing" OR "racism" OR "colonialism" OR "employment" OR "working conditions" OR "education" OR "literacy" OR "childhood experiences" OR "physical environment" OR "social supports" OR "community supports" OR "coping skills" OR "gender" OR "culture" OR "land" OR "animals" OR "water*" ) ).mp. [mp=title, abstract, heading word, table of contents, key concepts, original title, tests &amp; measures, mesh word]</p> <p>limit to (english language and yr ="1980-2023")</p> |
| <b>Anthropology Plus</b> |                                                                                                                                                                                                                                                                                                                                                                                                                                                                                                                                                                                                                                                                                            |
| Search Query 1 AND 2     | <p>TX ( "metis" OR "Métis*" OR "Métis Nation" OR "Métis-specific" OR "metis-specific" OR "mixed blood" OR "half-breed" OR "half breed" OR "voyageur") AND TX ("health*" OR "healthcare*" OR "healthcare" OR "health services" OR "well being" OR "wellbeing*" OR "well-being" OR "wellness*" OR "mental health" OR "medic*" OR "illness" OR "disease*" OR "condition" OR "healthy behaviours" OR "community wellbeing" OR "community well-being" OR "community well being" OR "community wellness")</p> <p>limit to (english language and yr ="1980-2023")<br/>Boolean/ Phrase</p>                                                                                                         |

|                                              |                                                                                                                                                                                                                                                                                                                                                                                                                                                                                                                                                                                  |
|----------------------------------------------|----------------------------------------------------------------------------------------------------------------------------------------------------------------------------------------------------------------------------------------------------------------------------------------------------------------------------------------------------------------------------------------------------------------------------------------------------------------------------------------------------------------------------------------------------------------------------------|
| Search Query 1 AND 3                         | TX ( "metis" OR "Métis*" OR "Métis Nation" OR "Métis-specific" OR "metis-specific" OR "mixed blood" OR "half-breed" OR "half breed" OR "voyageur") AND TX ( "Income" OR "social status" OR "poverty" OR "housing" OR "racism" OR "colonialism" OR "employment" OR "working conditions" OR "education" OR "literacy" OR "childhood experiences" OR "physical environment" OR "social supports" OR "community supports" OR "coping skills" OR "gender" OR "culture" OR "land" OR "animals" OR "water*" )<br><br>limit to (english language and yr ="1980-2023")<br>Boolean/ Phrase |
| <b>Bibliography of Indigenous Peoples</b>    |                                                                                                                                                                                                                                                                                                                                                                                                                                                                                                                                                                                  |
| Search Query 1 AND 2                         | AB ( "metis" OR "Métis*" OR "Métis Nation" OR "Métis-specific" OR "metis-specific" OR "mixed blood" OR "half-breed" OR "half breed" OR "voyageur") AND AB ( "health*" OR "healthcare*" OR "healthcare" OR "health services" OR "well being" OR "wellbeing*" OR "well-being" OR "wellness*" OR "mental health" OR "medic*" OR "illness" OR "disease*" OR "condition" OR "healthy behaviours" OR "community wellbeing" OR "community well-being" OR "community well being" OR "community wellness")<br><br>limit to (english language and yr ="1980-2023")<br>Boolean/ Phrase      |
| Search Query 1 AND 3                         | AB ( "metis" OR "Métis*" OR "Métis Nation" OR "Métis-specific" OR "metis-specific" OR "mixed blood" OR "half-breed" OR "half breed" OR "voyageur") AND AB ( "Income" OR "social status" OR "poverty" OR "housing" OR "racism" OR "colonialism" OR "employment" OR "working conditions" OR "education" OR "literacy" OR "childhood experiences" OR "physical environment" OR "social supports" OR "community supports" OR "coping skills" OR "gender" OR "culture" OR "land" OR "animals" OR "water*" )<br><br>limit to (english language and yr ="1980-2023")<br>Boolean/ Phrase |
| <b>Canadian Business and Current Affairs</b> |                                                                                                                                                                                                                                                                                                                                                                                                                                                                                                                                                                                  |
| Search Query 1 AND 2                         | summary ( "metis" OR "Métis*" OR "Métis Nation" OR "Métis-specific" OR "metis-specific" OR "mixed blood" OR "half-breed" OR "half breed" OR "voyageur") AND summary ( "health*" OR "healthcare*" OR "healthcare" OR "health services" OR "well being" OR "wellbeing*" OR "well-being" OR "wellness*" OR "mental health" OR "medic*" OR "illness" OR "disease*" OR "condition" OR "healthy behaviours" OR "community wellbeing" OR "community well-being" OR "community well being" OR "community wellness")<br><br>limit to (english language and yr ="1980-2023")               |
| Search Query 1 AND 3                         | summary ( "metis" OR "Métis*" OR "Métis Nation" OR "Métis-specific" OR "metis-specific" OR "mixed blood" OR "half-breed" OR "half breed" OR "voyageur") AND summary ( "Income" OR "social status" OR "poverty" OR "housing" OR "racism" OR "colonialism" OR "employment" OR "working conditions" OR "education" OR "literacy" OR "childhood experiences" OR "physical environment" OR "social supports" OR "community supports" OR "coping skills" OR "gender" OR "culture" OR "land" OR "animals" OR "water*" )                                                                 |

|                                       |                                                                                                                                                                                                                                                                                                                                                                                                                                                                                                                                                                                                                                                                                                                                                                                                                                                                                                                                                                                                                                                                                                                                                                                                                                                                                                                                                                            |
|---------------------------------------|----------------------------------------------------------------------------------------------------------------------------------------------------------------------------------------------------------------------------------------------------------------------------------------------------------------------------------------------------------------------------------------------------------------------------------------------------------------------------------------------------------------------------------------------------------------------------------------------------------------------------------------------------------------------------------------------------------------------------------------------------------------------------------------------------------------------------------------------------------------------------------------------------------------------------------------------------------------------------------------------------------------------------------------------------------------------------------------------------------------------------------------------------------------------------------------------------------------------------------------------------------------------------------------------------------------------------------------------------------------------------|
|                                       | limit to (english language and yr ="1980-2023")                                                                                                                                                                                                                                                                                                                                                                                                                                                                                                                                                                                                                                                                                                                                                                                                                                                                                                                                                                                                                                                                                                                                                                                                                                                                                                                            |
| <b>Informit Indigenous Collection</b> |                                                                                                                                                                                                                                                                                                                                                                                                                                                                                                                                                                                                                                                                                                                                                                                                                                                                                                                                                                                                                                                                                                                                                                                                                                                                                                                                                                            |
| Search Query 1 AND 2                  | [Abstract:"metis" OR "Métis*" OR "Métis Nation" OR "Métis-specific" OR "metis-specific" OR "mixed blood" OR "half-breed" OR "half breed" OR "voyageur" OR Abstract:"health*" OR "healthcare*" OR "healthcare" OR "health services" OR "well being" OR "wellbeing*" OR "well-being" OR "wellness*" OR "mental health" OR "medic*" OR "illness" OR "disease*" OR "condition" OR "healthy behaviours" OR "community wellbeing" OR "community well-being" OR "community well being" OR "community wellness" OR Abstract: 'métis nation' OR Abstract: 'métis-specific' OR Abstract: 'metis-specific' OR Abstract: 'mixed blood' OR Abstract: 'half-breed' OR Abstract: 'half breed' OR Abstract: 'voyageur'] AND [Abstract: 'health*' OR Abstract: 'healthcare*' OR Abstract: 'healthcare' OR Abstract: 'health services' OR Abstract: 'well being' OR Abstract: 'wellbeing*' OR Abstract: 'well-being' OR Abstract: 'wellness*' OR Abstract: 'mental health' OR Abstract: 'medic*' OR Abstract: 'illness' OR Abstract: 'disease*' OR Abstract: 'condition' OR Abstract: 'healthy behaviours' OR Abstract: 'community wellbeing' OR Abstract: 'community well-being' OR Abstract: 'community well being' OR Abstract: 'community wellness'] AND Publication Date: (01/01/1980 TO 12/31/2023)<br><br>limit to (english language and yr ="1980-2023")                             |
| Search Query 1 AND 3                  | [Abstract:"metis" OR "Métis*" OR "Métis Nation" OR "Métis-specific" OR "metis-specific" OR "mixed blood" OR "half-breed" OR "half breed" OR "voyageur" OR Abstract:"Income" OR "social status" OR "poverty" OR "housing" OR "racism" OR "colonialism" OR "employment" OR "working conditions" OR "education" OR "literacy" OR "childhood experiences" OR "physical environment" OR "social supports" OR "community supports" OR "coping skills" OR "gender" OR "culture" OR "land" OR "animals" OR "water*" OR Abstract: 'métis nation' OR Abstract: 'métis-specific' OR Abstract: 'metis-specific' OR Abstract: 'mixed blood' OR Abstract: 'half-breed' OR Abstract: 'half breed' OR Abstract: 'voyageur'] AND [Abstract: 'income' OR Abstract: 'social status' OR Abstract: 'poverty' OR Abstract: 'housing' OR Abstract: 'racism' OR Abstract: 'colonialism' OR Abstract: 'employment' OR Abstract: 'working conditions' OR Abstract: 'education' OR Abstract: 'literacy' OR Abstract: 'childhood experiences' OR Abstract: 'physical environment' OR Abstract: 'social supports' OR Abstract: 'community supports' OR Abstract: 'coping skills' OR Abstract: 'gender' OR Abstract: 'culture' OR Abstract: 'land' OR Abstract: 'animals' OR Abstract: 'water*'] AND Publication Date: (01/01/1980 TO 12/31/2023)<br><br>limit to (english language and yr ="1980-2023") |
| <b>PubMed</b>                         |                                                                                                                                                                                                                                                                                                                                                                                                                                                                                                                                                                                                                                                                                                                                                                                                                                                                                                                                                                                                                                                                                                                                                                                                                                                                                                                                                                            |
| Search Query 1 AND 2                  | ("metis"[Title/Abstract] OR "Métis*" [Title/Abstract] OR "Métis Nation"[Title/Abstract] OR "Métis-specific"[Title/Abstract] OR "metis-specific"[Title/Abstract] OR "mixed blood"[Title/Abstract] OR "half-breed"[Title/Abstract] OR "half breed"[Title/Abstract] OR "voyageur"[Title/Abstract]) AND ("health*" [Title/Abstract] OR "healthcare*" [Title/Abstract] OR "healthcare" [Title/Abstract] OR "health services" [Title/Abstract] OR "well being" [Title/Abstract] OR "wellbeing*" [Title/Abstract]                                                                                                                                                                                                                                                                                                                                                                                                                                                                                                                                                                                                                                                                                                                                                                                                                                                                 |

|                                  |                                                                                                                                                                                                                                                                                                                                                                                                                                                                                                                                                                                                                                                                                                                                                                                                                                                                                                                                                                                                                               |
|----------------------------------|-------------------------------------------------------------------------------------------------------------------------------------------------------------------------------------------------------------------------------------------------------------------------------------------------------------------------------------------------------------------------------------------------------------------------------------------------------------------------------------------------------------------------------------------------------------------------------------------------------------------------------------------------------------------------------------------------------------------------------------------------------------------------------------------------------------------------------------------------------------------------------------------------------------------------------------------------------------------------------------------------------------------------------|
|                                  | <p>OR "well-being"[Title/Abstract] OR "wellness*"[Title/Abstract] OR "mental health"[Title/Abstract] OR "medic*"[Title/Abstract] OR "illness"[Title/Abstract] OR "disease*"[Title/Abstract] OR "condition"[Title/Abstract] OR "healthy behaviours"[Title/Abstract] OR "community wellbeing"[Title/Abstract] OR "community well-being"[Title/Abstract] OR "community well being"[Title/Abstract] OR "community wellness"[Title/Abstract])</p> <p>Abstract, English, from 1980-2023</p>                                                                                                                                                                                                                                                                                                                                                                                                                                                                                                                                         |
| Search Query 1 AND 3             | <p>("metis"[Title/Abstract] OR "Métis*"[Title/Abstract] OR "Métis Nation"[Title/Abstract] OR "Métis-specific"[Title/Abstract] OR "metis-specific"[Title/Abstract] OR "mixed blood"[Title/Abstract] OR "half-breed"[Title/Abstract] OR "half breed"[Title/Abstract] OR "voyageur"[Title/Abstract]) AND ("Income"[Title/Abstract] OR "social status"[Title/Abstract] OR "poverty"[Title/Abstract] OR "housing"[Title/Abstract] OR "racism"[Title/Abstract] OR "colonialism"[Title/Abstract] OR "employment"[Title/Abstract] OR "working conditions"[Title/Abstract] OR "education"[Title/Abstract] OR "literacy"[Title/Abstract] OR "childhood experiences"[Title/Abstract] OR "physical environment"[Title/Abstract] OR "social supports"[Title/Abstract] OR "community supports"[Title/Abstract] OR "coping skills"[Title/Abstract] OR "gender"[Title/Abstract] OR "culture"[Title/Abstract] OR "land"[Title/Abstract] OR "animals"[Title/Abstract] OR "water*"[Title/Abstract])</p> <p>Abstract, English, from 1980-2023</p> |
| <b>ProQuest</b>                  |                                                                                                                                                                                                                                                                                                                                                                                                                                                                                                                                                                                                                                                                                                                                                                                                                                                                                                                                                                                                                               |
| Search Query 1 AND 2             | <p>((("metis" or "Métis*" or "Métis Nation" or "Métis-specific" or "metis-specific" or "mixed blood" or "half-breed" or "half breed" or "voyageur") and ("health*" or "healthcare*" or "healthcare" or "health services" or "well being" or "wellbeing*" or "well-being" or "wellness*" or "mental health" or "medic*" or "illness" or "disease*" or "condition" or "healthy behaviours" or "community wellbeing" or "community well-being" or "community well being" or "community wellness")).mp. [mp=title, abstract, heading word, table of contents, key concepts, original title, tests &amp; measures, mesh word])</p> <p>limit to (english language and yr ="1980-2023")</p>                                                                                                                                                                                                                                                                                                                                          |
| Search Query 1 AND 3             | <p>((("metis" or "Métis*" or "Métis Nation" or "Métis-specific" or "metis-specific" or "mixed blood" or "half-breed" or "half breed" or "voyageur") and ( "Income" OR "social status" OR "poverty" OR "housing" OR "racism" OR "colonialism" OR "employment" OR "working conditions" OR "education" OR "literacy" OR "childhood experiences" OR "physical environment" OR "social supports" OR "community supports" OR "coping skills" OR "gender" OR "culture" OR "land" OR "animals" OR "water*" )).mp. [mp=title, abstract, heading word, table of contents, key concepts, original title, tests &amp; measures, mesh word])</p> <p>limit to (english language and yr ="1980-2023")</p>                                                                                                                                                                                                                                                                                                                                    |
| <b>Indigenous Studies Portal</b> |                                                                                                                                                                                                                                                                                                                                                                                                                                                                                                                                                                                                                                                                                                                                                                                                                                                                                                                                                                                                                               |

|                                                         |
|---------------------------------------------------------|
| Métis AND Health                                        |
| <b>Collaborative Indigenous Research Digital Garden</b> |
| Métis                                                   |

**Hand-searching**

|                                         |                                                                                                                                                                                                                                                                                                                                                                                                                                                                                                                                |
|-----------------------------------------|--------------------------------------------------------------------------------------------------------------------------------------------------------------------------------------------------------------------------------------------------------------------------------------------------------------------------------------------------------------------------------------------------------------------------------------------------------------------------------------------------------------------------------|
| <b>Métis Nation of Alberta</b>          | Resources > Publication (filter: health-related reports)                                                                                                                                                                                                                                                                                                                                                                                                                                                                       |
| <b>Métis Nation BC</b>                  | MNBC Work and Programs<br>> Health<br>> Reports<br>> Downloadable Resources<br>> *all reports and research from these pages were downloaded*                                                                                                                                                                                                                                                                                                                                                                                   |
| <b>Manitoba Métis Federation</b>        | Departments/ Affiliates<br>> Health and Wellness<br>> Publications<br>> *all reports and research from this page were downloaded*                                                                                                                                                                                                                                                                                                                                                                                              |
| <b>Métis Nation - Saskatchewan</b>      | Menu> Health                                                                                                                                                                                                                                                                                                                                                                                                                                                                                                                   |
| <b>Métis Nation of Ontario</b>          | Programs and Services<br>> Healing and Wellness<br>> Health Research Initiative and Projects<br>> Current Projects<br>> Chronic Disease Surveillance Program<br>> Press Releases<br>> Initiative Reports<br>> General Reports<br>> Cardiovascular Disease Reports<br>> Diabetes Reports<br>> Cancer Reports<br>> Respiratory Disease Reports<br>> Other Medical Reports<br>> Past Projects<br>>Our Health Counts Project<br>>Youth Identity Project<br>> Indigenous Knowledge Network Initiative<br>>Healthy Messaging Project |
| <b>Métis Settlement Alberta</b>         | Search: "health"                                                                                                                                                                                                                                                                                                                                                                                                                                                                                                               |
| <b>Northwest Territory Métis Nation</b> | Search: "health"                                                                                                                                                                                                                                                                                                                                                                                                                                                                                                               |
| <b>Les Femmes Michif Optemisiwak</b>    | Menu > Resources > Advanced Search                                                                                                                                                                                                                                                                                                                                                                                                                                                                                             |

|                          |                                                              |
|--------------------------|--------------------------------------------------------------|
|                          | Advanced Search Filters > Types of Resources: "Report"       |
| <b>Statistics Canada</b> | Subjects > Indigenous Health > Health and Well-being > Métis |

**Google Chrome General Grey Literature Search Strategy**

Operating System: Windows

Search Engine: Google Chrome

Search: "metis health and wellness"

Search Total Results: 3,650,000
